# Supplementary material
Source: publisher figshare collection journal article supplement (https://sage.figshare.com/ndownloader/files/14993726)
Supplement: Supplementary file 1 [file 14993726]

## A Survey on Women's Experience with a Surgical Procedure called a Hysterectomy

### Data Dictionary Codebook

10/28/2015 1:51pm

| #                                                                 | Variable / Field Name          | Field Label<br><i>Field Note</i>                                                                                                                                                | Field Attributes (Field Type, Validation, Choices, Calculations, etc.)                                                                                                                                                                                                                              |   |                          |   |             |   |                                |   |                       |   |         |
|-------------------------------------------------------------------|--------------------------------|---------------------------------------------------------------------------------------------------------------------------------------------------------------------------------|-----------------------------------------------------------------------------------------------------------------------------------------------------------------------------------------------------------------------------------------------------------------------------------------------------|---|--------------------------|---|-------------|---|--------------------------------|---|-----------------------|---|---------|
| Instrument: <b>Survey on Women's Experience with Hysterectomy</b> |                                |                                                                                                                                                                                 |                                                                                                                                                                                                                                                                                                     |   |                          |   |             |   |                                |   |                       |   |         |
| 1                                                                 | record_id                      | Study ID                                                                                                                                                                        | text                                                                                                                                                                                                                                                                                                |   |                          |   |             |   |                                |   |                       |   |         |
| 2                                                                 | date_of_survey                 | What is today's date?                                                                                                                                                           | text (date_dmy), Required<br>Custom alignment: LV                                                                                                                                                                                                                                                   |   |                          |   |             |   |                                |   |                       |   |         |
| 3                                                                 | hysterectomy_yes_no            | Have you had a hysterectomy (removal of the uterus/womb with or without the ovaries) in the last 2 years?<br><i>If No, please do not continue completing this questionnaire</i> | yesno, Required<br><table><tr><td>1</td><td>Yes</td></tr><tr><td>0</td><td>No</td></tr></table><br>Custom alignment: LV<br>Question number: 1<br>Stop actions on 0                                                                                                                                  | 1 | Yes                      | 0 | No          |   |                                |   |                       |   |         |
| 1                                                                 | Yes                            |                                                                                                                                                                                 |                                                                                                                                                                                                                                                                                                     |   |                          |   |             |   |                                |   |                       |   |         |
| 0                                                                 | No                             |                                                                                                                                                                                 |                                                                                                                                                                                                                                                                                                     |   |                          |   |             |   |                                |   |                       |   |         |
| 4                                                                 | postcode                       | What is your postcode?                                                                                                                                                          | text (postalcode_australia), Required<br>Custom alignment: LV<br>Question number: 2                                                                                                                                                                                                                 |   |                          |   |             |   |                                |   |                       |   |         |
| 5                                                                 | birth_year                     | What is the year of your birth?                                                                                                                                                 | text (number, Min: 1900, Max: 2000), Required<br>Custom alignment: LV<br>Question number: 3                                                                                                                                                                                                         |   |                          |   |             |   |                                |   |                       |   |         |
| 6                                                                 | height                         | What is your height (cm)?                                                                                                                                                       | text (number, Min: 130, Max: 215), Required<br>Custom alignment: LV<br>Question number: 4                                                                                                                                                                                                           |   |                          |   |             |   |                                |   |                       |   |         |
| 7                                                                 | weight                         | What is your weight (kg)?                                                                                                                                                       | text (integer, Min: 35, Max: 200), Required<br>Custom alignment: LV<br>Question number: 5                                                                                                                                                                                                           |   |                          |   |             |   |                                |   |                       |   |         |
| 8                                                                 | weight_at_hysterectomy         | What was your approximate weight at the time of your hysterectomy (kg)?                                                                                                         | text (integer, Min: 35, Max: 200)<br>Custom alignment: LV<br>Question number: 6                                                                                                                                                                                                                     |   |                          |   |             |   |                                |   |                       |   |         |
| 9                                                                 | marital_status                 | What is your current marital status?                                                                                                                                            | radio, Required<br><table><tr><td>0</td><td>Single</td></tr><tr><td>1</td><td>Married</td></tr><tr><td>2</td><td>Defacto or living with partner</td></tr><tr><td>3</td><td>Separated or divorced</td></tr><tr><td>4</td><td>Widowed</td></tr></table><br>Custom alignment: LV<br>Question number: 7 | 0 | Single                   | 1 | Married     | 2 | Defacto or living with partner | 3 | Separated or divorced | 4 | Widowed |
| 0                                                                 | Single                         |                                                                                                                                                                                 |                                                                                                                                                                                                                                                                                                     |   |                          |   |             |   |                                |   |                       |   |         |
| 1                                                                 | Married                        |                                                                                                                                                                                 |                                                                                                                                                                                                                                                                                                     |   |                          |   |             |   |                                |   |                       |   |         |
| 2                                                                 | Defacto or living with partner |                                                                                                                                                                                 |                                                                                                                                                                                                                                                                                                     |   |                          |   |             |   |                                |   |                       |   |         |
| 3                                                                 | Separated or divorced          |                                                                                                                                                                                 |                                                                                                                                                                                                                                                                                                     |   |                          |   |             |   |                                |   |                       |   |         |
| 4                                                                 | Widowed                        |                                                                                                                                                                                 |                                                                                                                                                                                                                                                                                                     |   |                          |   |             |   |                                |   |                       |   |         |
| 10                                                                | household_income               | What is your household's yearly income?                                                                                                                                         | radio, Required<br><table><tr><td>0</td><td>I'd prefer not to answer</td></tr><tr><td>1</td><td>\$1-\$4,159</td></tr><tr><td>2</td><td>\$4,160-\$6,239</td></tr><tr><td>3</td><td>\$6,240-\$10,399</td></tr></table>                                                                                | 0 | I'd prefer not to answer | 1 | \$1-\$4,159 | 2 | \$4,160-\$6,239                | 3 | \$6,240-\$10,399      |   |         |
| 0                                                                 | I'd prefer not to answer       |                                                                                                                                                                                 |                                                                                                                                                                                                                                                                                                     |   |                          |   |             |   |                                |   |                       |   |         |
| 1                                                                 | \$1-\$4,159                    |                                                                                                                                                                                 |                                                                                                                                                                                                                                                                                                     |   |                          |   |             |   |                                |   |                       |   |         |
| 2                                                                 | \$4,160-\$6,239                |                                                                                                                                                                                 |                                                                                                                                                                                                                                                                                                     |   |                          |   |             |   |                                |   |                       |   |         |
| 3                                                                 | \$6,240-\$10,399               |                                                                                                                                                                                 |                                                                                                                                                                                                                                                                                                     |   |                          |   |             |   |                                |   |                       |   |         |

|    |                                                                                                    |                                                                              |                                                                                                                                                                                                                                                                                                                                                                                                                                                                                                                                                                                                                                              |   |                          |   |                                                             |   |                                       |   |                                     |   |                                            |   |                                           |    |                              |   |                      |
|----|----------------------------------------------------------------------------------------------------|------------------------------------------------------------------------------|----------------------------------------------------------------------------------------------------------------------------------------------------------------------------------------------------------------------------------------------------------------------------------------------------------------------------------------------------------------------------------------------------------------------------------------------------------------------------------------------------------------------------------------------------------------------------------------------------------------------------------------------|---|--------------------------|---|-------------------------------------------------------------|---|---------------------------------------|---|-------------------------------------|---|--------------------------------------------|---|-------------------------------------------|----|------------------------------|---|----------------------|
|    |                                                                                                    |                                                                              | <table border="1"> <tr><td>4</td><td>\$10,400-\$15,599</td></tr> <tr><td>5</td><td>\$15,600-\$25,999</td></tr> <tr><td>6</td><td>\$26,000-\$36,399</td></tr> <tr><td>7</td><td>\$36,400-\$51,999</td></tr> <tr><td>8</td><td>\$52,000-\$77,999</td></tr> <tr><td>9</td><td>\$78,000-\$103,999</td></tr> <tr><td>10</td><td>Over \$104,000</td></tr> </table> <p>Custom alignment: LV<br/>Question number: 8</p>                                                                                                                                                                                                                              | 4 | \$10,400-\$15,599        | 5 | \$15,600-\$25,999                                           | 6 | \$26,000-\$36,399                     | 7 | \$36,400-\$51,999                   | 8 | \$52,000-\$77,999                          | 9 | \$78,000-\$103,999                        | 10 | Over \$104,000               |   |                      |
| 4  | \$10,400-\$15,599                                                                                  |                                                                              |                                                                                                                                                                                                                                                                                                                                                                                                                                                                                                                                                                                                                                              |   |                          |   |                                                             |   |                                       |   |                                     |   |                                            |   |                                           |    |                              |   |                      |
| 5  | \$15,600-\$25,999                                                                                  |                                                                              |                                                                                                                                                                                                                                                                                                                                                                                                                                                                                                                                                                                                                                              |   |                          |   |                                                             |   |                                       |   |                                     |   |                                            |   |                                           |    |                              |   |                      |
| 6  | \$26,000-\$36,399                                                                                  |                                                                              |                                                                                                                                                                                                                                                                                                                                                                                                                                                                                                                                                                                                                                              |   |                          |   |                                                             |   |                                       |   |                                     |   |                                            |   |                                           |    |                              |   |                      |
| 7  | \$36,400-\$51,999                                                                                  |                                                                              |                                                                                                                                                                                                                                                                                                                                                                                                                                                                                                                                                                                                                                              |   |                          |   |                                                             |   |                                       |   |                                     |   |                                            |   |                                           |    |                              |   |                      |
| 8  | \$52,000-\$77,999                                                                                  |                                                                              |                                                                                                                                                                                                                                                                                                                                                                                                                                                                                                                                                                                                                                              |   |                          |   |                                                             |   |                                       |   |                                     |   |                                            |   |                                           |    |                              |   |                      |
| 9  | \$78,000-\$103,999                                                                                 |                                                                              |                                                                                                                                                                                                                                                                                                                                                                                                                                                                                                                                                                                                                                              |   |                          |   |                                                             |   |                                       |   |                                     |   |                                            |   |                                           |    |                              |   |                      |
| 10 | Over \$104,000                                                                                     |                                                                              |                                                                                                                                                                                                                                                                                                                                                                                                                                                                                                                                                                                                                                              |   |                          |   |                                                             |   |                                       |   |                                     |   |                                            |   |                                           |    |                              |   |                      |
| 11 | private_health_insurance                                                                           | Do you have private health insurance?                                        | <p>radio, Required</p> <table border="1"> <tr><td>0</td><td>No</td></tr> <tr><td>1</td><td>Yes, hospital only</td></tr> <tr><td>2</td><td>Yes, hospital plus extras</td></tr> <tr><td>3</td><td>Yes, extras only</td></tr> <tr><td>4</td><td>Other please specify</td></tr> </table> <p>Custom alignment: LV<br/>Question number: 9</p>                                                                                                                                                                                                                                                                                                      | 0 | No                       | 1 | Yes, hospital only                                          | 2 | Yes, hospital plus extras             | 3 | Yes, extras only                    | 4 | Other please specify                       |   |                                           |    |                              |   |                      |
| 0  | No                                                                                                 |                                                                              |                                                                                                                                                                                                                                                                                                                                                                                                                                                                                                                                                                                                                                              |   |                          |   |                                                             |   |                                       |   |                                     |   |                                            |   |                                           |    |                              |   |                      |
| 1  | Yes, hospital only                                                                                 |                                                                              |                                                                                                                                                                                                                                                                                                                                                                                                                                                                                                                                                                                                                                              |   |                          |   |                                                             |   |                                       |   |                                     |   |                                            |   |                                           |    |                              |   |                      |
| 2  | Yes, hospital plus extras                                                                          |                                                                              |                                                                                                                                                                                                                                                                                                                                                                                                                                                                                                                                                                                                                                              |   |                          |   |                                                             |   |                                       |   |                                     |   |                                            |   |                                           |    |                              |   |                      |
| 3  | Yes, extras only                                                                                   |                                                                              |                                                                                                                                                                                                                                                                                                                                                                                                                                                                                                                                                                                                                                              |   |                          |   |                                                             |   |                                       |   |                                     |   |                                            |   |                                           |    |                              |   |                      |
| 4  | Other please specify                                                                               |                                                                              |                                                                                                                                                                                                                                                                                                                                                                                                                                                                                                                                                                                                                                              |   |                          |   |                                                             |   |                                       |   |                                     |   |                                            |   |                                           |    |                              |   |                      |
| 12 | other_cover_specify<br><small>Show the field ONLY if:<br/>[private_health_insurance] = '4'</small> | Other, please specify                                                        | <p>text, Required<br/>Custom alignment: LV<br/>Question number: 9a</p>                                                                                                                                                                                                                                                                                                                                                                                                                                                                                                                                                                       |   |                          |   |                                                             |   |                                       |   |                                     |   |                                            |   |                                           |    |                              |   |                      |
| 13 | level_of_education                                                                                 | What is the highest level of education you have completed?                   | <p>radio, Required</p> <table border="1"> <tr><td>0</td><td>I'd prefer not to answer</td></tr> <tr><td>1</td><td>Did not complete primary school or have no formal schooling</td></tr> <tr><td>2</td><td>Completed primary school (or Grade 6)</td></tr> <tr><td>3</td><td>Completed junior high (or Grade 10)</td></tr> <tr><td>4</td><td>Completed senior high school (or Grade 12)</td></tr> <tr><td>5</td><td>Trade or technical certificate or diploma</td></tr> <tr><td>6</td><td>University or college degree</td></tr> <tr><td>7</td><td>Other please specify</td></tr> </table> <p>Custom alignment: LV<br/>Question number: 10</p> | 0 | I'd prefer not to answer | 1 | Did not complete primary school or have no formal schooling | 2 | Completed primary school (or Grade 6) | 3 | Completed junior high (or Grade 10) | 4 | Completed senior high school (or Grade 12) | 5 | Trade or technical certificate or diploma | 6  | University or college degree | 7 | Other please specify |
| 0  | I'd prefer not to answer                                                                           |                                                                              |                                                                                                                                                                                                                                                                                                                                                                                                                                                                                                                                                                                                                                              |   |                          |   |                                                             |   |                                       |   |                                     |   |                                            |   |                                           |    |                              |   |                      |
| 1  | Did not complete primary school or have no formal schooling                                        |                                                                              |                                                                                                                                                                                                                                                                                                                                                                                                                                                                                                                                                                                                                                              |   |                          |   |                                                             |   |                                       |   |                                     |   |                                            |   |                                           |    |                              |   |                      |
| 2  | Completed primary school (or Grade 6)                                                              |                                                                              |                                                                                                                                                                                                                                                                                                                                                                                                                                                                                                                                                                                                                                              |   |                          |   |                                                             |   |                                       |   |                                     |   |                                            |   |                                           |    |                              |   |                      |
| 3  | Completed junior high (or Grade 10)                                                                |                                                                              |                                                                                                                                                                                                                                                                                                                                                                                                                                                                                                                                                                                                                                              |   |                          |   |                                                             |   |                                       |   |                                     |   |                                            |   |                                           |    |                              |   |                      |
| 4  | Completed senior high school (or Grade 12)                                                         |                                                                              |                                                                                                                                                                                                                                                                                                                                                                                                                                                                                                                                                                                                                                              |   |                          |   |                                                             |   |                                       |   |                                     |   |                                            |   |                                           |    |                              |   |                      |
| 5  | Trade or technical certificate or diploma                                                          |                                                                              |                                                                                                                                                                                                                                                                                                                                                                                                                                                                                                                                                                                                                                              |   |                          |   |                                                             |   |                                       |   |                                     |   |                                            |   |                                           |    |                              |   |                      |
| 6  | University or college degree                                                                       |                                                                              |                                                                                                                                                                                                                                                                                                                                                                                                                                                                                                                                                                                                                                              |   |                          |   |                                                             |   |                                       |   |                                     |   |                                            |   |                                           |    |                              |   |                      |
| 7  | Other please specify                                                                               |                                                                              |                                                                                                                                                                                                                                                                                                                                                                                                                                                                                                                                                                                                                                              |   |                          |   |                                                             |   |                                       |   |                                     |   |                                            |   |                                           |    |                              |   |                      |
| 14 | other_specify_education<br><small>Show the field ONLY if:<br/>[level_of_education] = '7'</small>   | Other please specify                                                         | <p>text, Required<br/>Custom alignment: LV<br/>Question number: 10a</p>                                                                                                                                                                                                                                                                                                                                                                                                                                                                                                                                                                      |   |                          |   |                                                             |   |                                       |   |                                     |   |                                            |   |                                           |    |                              |   |                      |
| 15 | menopause                                                                                          | Had you gone through menopause or 'change of life' before your hysterectomy? | <p>yesno, Required</p> <table border="1"> <tr><td>1</td><td>Yes</td></tr> <tr><td>0</td><td>No</td></tr> </table>                                                                                                                                                                                                                                                                                                                                                                                                                                                                                                                            | 1 | Yes                      | 0 | No                                                          |   |                                       |   |                                     |   |                                            |   |                                           |    |                              |   |                      |
| 1  | Yes                                                                                                |                                                                              |                                                                                                                                                                                                                                                                                                                                                                                                                                                                                                                                                                                                                                              |   |                          |   |                                                             |   |                                       |   |                                     |   |                                            |   |                                           |    |                              |   |                      |
| 0  | No                                                                                                 |                                                                              |                                                                                                                                                                                                                                                                                                                                                                                                                                                                                                                                                                                                                                              |   |                          |   |                                                             |   |                                       |   |                                     |   |                                            |   |                                           |    |                              |   |                      |

|                    |                                                                                          |                                                                                       |                                                                                                                                                                                                                                                                                                                                                                                                                          |  |  |                    |     |   |    |                          |                              |   |                          |                   |   |                          |                                                                       |
|--------------------|------------------------------------------------------------------------------------------|---------------------------------------------------------------------------------------|--------------------------------------------------------------------------------------------------------------------------------------------------------------------------------------------------------------------------------------------------------------------------------------------------------------------------------------------------------------------------------------------------------------------------|--|--|--------------------|-----|---|----|--------------------------|------------------------------|---|--------------------------|-------------------|---|--------------------------|-----------------------------------------------------------------------|
|                    |                                                                                          |                                                                                       | Custom alignment: LV<br>Question number: 11                                                                                                                                                                                                                                                                                                                                                                              |  |  |                    |     |   |    |                          |                              |   |                          |                   |   |                          |                                                                       |
| 16                 | pregnancies_yes_no<br><br>Show the field ONLY if:<br>[pregnancies_yes_no] = '1'          | Have you ever been pregnant?                                                          | yesno, Required<br><table><tr><td>1</td><td>Yes</td></tr><tr><td>0</td><td>No</td></tr></table><br>Custom alignment: LV<br>Question number: 12                                                                                                                                                                                                                                                                           |  |  | 1                  | Yes | 0 | No |                          |                              |   |                          |                   |   |                          |                                                                       |
| 1                  | Yes                                                                                      |                                                                                       |                                                                                                                                                                                                                                                                                                                                                                                                                          |  |  |                    |     |   |    |                          |                              |   |                          |                   |   |                          |                                                                       |
| 0                  | No                                                                                       |                                                                                       |                                                                                                                                                                                                                                                                                                                                                                                                                          |  |  |                    |     |   |    |                          |                              |   |                          |                   |   |                          |                                                                       |
| 17                 | number_pregnancies<br><br>Show the field ONLY if:<br>[pregnancies_yes_no] = '1'          | How many pregnancies have you had?                                                    | text, Required<br>Custom alignment: LV<br>Question number: 12a                                                                                                                                                                                                                                                                                                                                                           |  |  |                    |     |   |    |                          |                              |   |                          |                   |   |                          |                                                                       |
| 18                 | had_children<br><br>Show the field ONLY if:<br>[pregnancies_yes_no] = '1'                | Have you had any children?                                                            | yesno, Required<br><table><tr><td>1</td><td>Yes</td></tr><tr><td>0</td><td>No</td></tr></table><br>Custom alignment: LV<br>Question number: 12b                                                                                                                                                                                                                                                                          |  |  | 1                  | Yes | 0 | No |                          |                              |   |                          |                   |   |                          |                                                                       |
| 1                  | Yes                                                                                      |                                                                                       |                                                                                                                                                                                                                                                                                                                                                                                                                          |  |  |                    |     |   |    |                          |                              |   |                          |                   |   |                          |                                                                       |
| 0                  | No                                                                                       |                                                                                       |                                                                                                                                                                                                                                                                                                                                                                                                                          |  |  |                    |     |   |    |                          |                              |   |                          |                   |   |                          |                                                                       |
| 19                 | number_of_children<br><br>Show the field ONLY if:<br>[had_children] = '1'                | How many children have you had?                                                       | text (number), Required<br>Custom alignment: LV<br>Question number: 12c                                                                                                                                                                                                                                                                                                                                                  |  |  |                    |     |   |    |                          |                              |   |                          |                   |   |                          |                                                                       |
| 20                 | children_delivered_by<br><br>Show the field ONLY if:<br>[had_children] = '1'             | How were they delivered?<br><i>select all that apply</i>                              | <table><tr><td colspan="3">checkbox, Required</td></tr><tr><td>1</td><td>children_delivered_by__1</td><td>Spontaneous Vaginal Delivery</td></tr><tr><td>2</td><td>children_delivered_by__2</td><td>Caesarean Section</td></tr><tr><td>3</td><td>children_delivered_by__3</td><td>Forceps Delivery (doctor uses special equipment to help get baby out)</td></tr></table><br>Custom alignment: LV<br>Question number: 12d |  |  | checkbox, Required |     |   | 1  | children_delivered_by__1 | Spontaneous Vaginal Delivery | 2 | children_delivered_by__2 | Caesarean Section | 3 | children_delivered_by__3 | Forceps Delivery (doctor uses special equipment to help get baby out) |
| checkbox, Required |                                                                                          |                                                                                       |                                                                                                                                                                                                                                                                                                                                                                                                                          |  |  |                    |     |   |    |                          |                              |   |                          |                   |   |                          |                                                                       |
| 1                  | children_delivered_by__1                                                                 | Spontaneous Vaginal Delivery                                                          |                                                                                                                                                                                                                                                                                                                                                                                                                          |  |  |                    |     |   |    |                          |                              |   |                          |                   |   |                          |                                                                       |
| 2                  | children_delivered_by__2                                                                 | Caesarean Section                                                                     |                                                                                                                                                                                                                                                                                                                                                                                                                          |  |  |                    |     |   |    |                          |                              |   |                          |                   |   |                          |                                                                       |
| 3                  | children_delivered_by__3                                                                 | Forceps Delivery (doctor uses special equipment to help get baby out)                 |                                                                                                                                                                                                                                                                                                                                                                                                                          |  |  |                    |     |   |    |                          |                              |   |                          |                   |   |                          |                                                                       |
| 21                 | svd_number<br><br>Show the field ONLY if:<br>[children_delivered_by(1)] = '1'            | How many were by spontaneous vaginal delivery?                                        | text (number), Required<br>Custom alignment: LV<br>Question number: 12d1                                                                                                                                                                                                                                                                                                                                                 |  |  |                    |     |   |    |                          |                              |   |                          |                   |   |                          |                                                                       |
| 22                 | c_section_numbers<br><br>Show the field ONLY if:<br>[children_delivered_by(2)] = '1'     | How many were by caesarean section?                                                   | text (number), Required<br>Custom alignment: LV<br>Question number: 12d2                                                                                                                                                                                                                                                                                                                                                 |  |  |                    |     |   |    |                          |                              |   |                          |                   |   |                          |                                                                       |
| 23                 | equipment_delivery_no<br><br>Show the field ONLY if:<br>[children_delivered_by(3)] = '1' | How many were by forceps delivery or other special equipment used by the doctor?      | text (number), Required<br>Custom alignment: LV<br>Question number: 12d3                                                                                                                                                                                                                                                                                                                                                 |  |  |                    |     |   |    |                          |                              |   |                          |                   |   |                          |                                                                       |
| 24                 | morbidities_at_hyst                                                                      | Below is a list of common health problems. Please select one or more of the following | checkbox, Required                                                                                                                                                                                                                                                                                                                                                                                                       |  |  |                    |     |   |    |                          |                              |   |                          |                   |   |                          |                                                                       |

|    |                                                                                    |                                                                                                       |                                                                                                                                                                                                                                                                                                                                                                                                                                                                                                                                                                                                                                                                                                                                                                                                                                                                                                                                                                                                                                                                                                                                                                                                                                                                            |   |                         |                 |                 |                         |                    |   |                         |                                |   |                         |                                      |   |                         |                  |   |                         |                                 |   |                         |                |   |                         |           |   |                         |                          |    |                          |        |    |                          |                 |    |                          |                             |    |                          |         |    |                          |                  |    |                          |                       |
|----|------------------------------------------------------------------------------------|-------------------------------------------------------------------------------------------------------|----------------------------------------------------------------------------------------------------------------------------------------------------------------------------------------------------------------------------------------------------------------------------------------------------------------------------------------------------------------------------------------------------------------------------------------------------------------------------------------------------------------------------------------------------------------------------------------------------------------------------------------------------------------------------------------------------------------------------------------------------------------------------------------------------------------------------------------------------------------------------------------------------------------------------------------------------------------------------------------------------------------------------------------------------------------------------------------------------------------------------------------------------------------------------------------------------------------------------------------------------------------------------|---|-------------------------|-----------------|-----------------|-------------------------|--------------------|---|-------------------------|--------------------------------|---|-------------------------|--------------------------------------|---|-------------------------|------------------|---|-------------------------|---------------------------------|---|-------------------------|----------------|---|-------------------------|-----------|---|-------------------------|--------------------------|----|--------------------------|--------|----|--------------------------|-----------------|----|--------------------------|-----------------------------|----|--------------------------|---------|----|--------------------------|------------------|----|--------------------------|-----------------------|
|    |                                                                                    | that were occurring at the time you planned to have the hysterectomy.<br><i>select all that apply</i> | <table><tr><td>1</td><td>morbidities_at_hyst___1</td><td>No heal problem</td></tr><tr><td>2</td><td>morbidities_at_hyst___2</td><td>Heart disease</td></tr><tr><td>3</td><td>morbidities_at_hyst___3</td><td>High b/c pressure</td></tr><tr><td>4</td><td>morbidities_at_hyst___4</td><td>Lung disease</td></tr><tr><td>5</td><td>morbidities_at_hyst___5</td><td>Diabete mellitus</td></tr><tr><td>6</td><td>morbidities_at_hyst___6</td><td>Ulcer or stomach disease reflux</td></tr><tr><td>7</td><td>morbidities_at_hyst___7</td><td>Kidney disease</td></tr><tr><td>8</td><td>morbidities_at_hyst___8</td><td>Liver dis</td></tr><tr><td>9</td><td>morbidities_at_hyst___9</td><td>Anaemi other b/c disease</td></tr><tr><td>10</td><td>morbidities_at_hyst___10</td><td>Cancer</td></tr><tr><td>11</td><td>morbidities_at_hyst___11</td><td>Anxiety Depress</td></tr><tr><td>12</td><td>morbidities_at_hyst___12</td><td>Osteoar or degene arthritis</td></tr><tr><td>13</td><td>morbidities_at_hyst___13</td><td>Back pe</td></tr><tr><td>14</td><td>morbidities_at_hyst___14</td><td>Rheuma arthritis</td></tr><tr><td>15</td><td>morbidities_at_hyst___15</td><td>Other medical problem</td></tr></table> <div>Custom alignment: LV<br/>Question number: 13</div> | 1 | morbidities_at_hyst___1 | No heal problem | 2               | morbidities_at_hyst___2 | Heart disease      | 3 | morbidities_at_hyst___3 | High b/c pressure              | 4 | morbidities_at_hyst___4 | Lung disease                         | 5 | morbidities_at_hyst___5 | Diabete mellitus | 6 | morbidities_at_hyst___6 | Ulcer or stomach disease reflux | 7 | morbidities_at_hyst___7 | Kidney disease | 8 | morbidities_at_hyst___8 | Liver dis | 9 | morbidities_at_hyst___9 | Anaemi other b/c disease | 10 | morbidities_at_hyst___10 | Cancer | 11 | morbidities_at_hyst___11 | Anxiety Depress | 12 | morbidities_at_hyst___12 | Osteoar or degene arthritis | 13 | morbidities_at_hyst___13 | Back pe | 14 | morbidities_at_hyst___14 | Rheuma arthritis | 15 | morbidities_at_hyst___15 | Other medical problem |
| 1  | morbidities_at_hyst___1                                                            | No heal problem                                                                                       |                                                                                                                                                                                                                                                                                                                                                                                                                                                                                                                                                                                                                                                                                                                                                                                                                                                                                                                                                                                                                                                                                                                                                                                                                                                                            |   |                         |                 |                 |                         |                    |   |                         |                                |   |                         |                                      |   |                         |                  |   |                         |                                 |   |                         |                |   |                         |           |   |                         |                          |    |                          |        |    |                          |                 |    |                          |                             |    |                          |         |    |                          |                  |    |                          |                       |
| 2  | morbidities_at_hyst___2                                                            | Heart disease                                                                                         |                                                                                                                                                                                                                                                                                                                                                                                                                                                                                                                                                                                                                                                                                                                                                                                                                                                                                                                                                                                                                                                                                                                                                                                                                                                                            |   |                         |                 |                 |                         |                    |   |                         |                                |   |                         |                                      |   |                         |                  |   |                         |                                 |   |                         |                |   |                         |           |   |                         |                          |    |                          |        |    |                          |                 |    |                          |                             |    |                          |         |    |                          |                  |    |                          |                       |
| 3  | morbidities_at_hyst___3                                                            | High b/c pressure                                                                                     |                                                                                                                                                                                                                                                                                                                                                                                                                                                                                                                                                                                                                                                                                                                                                                                                                                                                                                                                                                                                                                                                                                                                                                                                                                                                            |   |                         |                 |                 |                         |                    |   |                         |                                |   |                         |                                      |   |                         |                  |   |                         |                                 |   |                         |                |   |                         |           |   |                         |                          |    |                          |        |    |                          |                 |    |                          |                             |    |                          |         |    |                          |                  |    |                          |                       |
| 4  | morbidities_at_hyst___4                                                            | Lung disease                                                                                          |                                                                                                                                                                                                                                                                                                                                                                                                                                                                                                                                                                                                                                                                                                                                                                                                                                                                                                                                                                                                                                                                                                                                                                                                                                                                            |   |                         |                 |                 |                         |                    |   |                         |                                |   |                         |                                      |   |                         |                  |   |                         |                                 |   |                         |                |   |                         |           |   |                         |                          |    |                          |        |    |                          |                 |    |                          |                             |    |                          |         |    |                          |                  |    |                          |                       |
| 5  | morbidities_at_hyst___5                                                            | Diabete mellitus                                                                                      |                                                                                                                                                                                                                                                                                                                                                                                                                                                                                                                                                                                                                                                                                                                                                                                                                                                                                                                                                                                                                                                                                                                                                                                                                                                                            |   |                         |                 |                 |                         |                    |   |                         |                                |   |                         |                                      |   |                         |                  |   |                         |                                 |   |                         |                |   |                         |           |   |                         |                          |    |                          |        |    |                          |                 |    |                          |                             |    |                          |         |    |                          |                  |    |                          |                       |
| 6  | morbidities_at_hyst___6                                                            | Ulcer or stomach disease reflux                                                                       |                                                                                                                                                                                                                                                                                                                                                                                                                                                                                                                                                                                                                                                                                                                                                                                                                                                                                                                                                                                                                                                                                                                                                                                                                                                                            |   |                         |                 |                 |                         |                    |   |                         |                                |   |                         |                                      |   |                         |                  |   |                         |                                 |   |                         |                |   |                         |           |   |                         |                          |    |                          |        |    |                          |                 |    |                          |                             |    |                          |         |    |                          |                  |    |                          |                       |
| 7  | morbidities_at_hyst___7                                                            | Kidney disease                                                                                        |                                                                                                                                                                                                                                                                                                                                                                                                                                                                                                                                                                                                                                                                                                                                                                                                                                                                                                                                                                                                                                                                                                                                                                                                                                                                            |   |                         |                 |                 |                         |                    |   |                         |                                |   |                         |                                      |   |                         |                  |   |                         |                                 |   |                         |                |   |                         |           |   |                         |                          |    |                          |        |    |                          |                 |    |                          |                             |    |                          |         |    |                          |                  |    |                          |                       |
| 8  | morbidities_at_hyst___8                                                            | Liver dis                                                                                             |                                                                                                                                                                                                                                                                                                                                                                                                                                                                                                                                                                                                                                                                                                                                                                                                                                                                                                                                                                                                                                                                                                                                                                                                                                                                            |   |                         |                 |                 |                         |                    |   |                         |                                |   |                         |                                      |   |                         |                  |   |                         |                                 |   |                         |                |   |                         |           |   |                         |                          |    |                          |        |    |                          |                 |    |                          |                             |    |                          |         |    |                          |                  |    |                          |                       |
| 9  | morbidities_at_hyst___9                                                            | Anaemi other b/c disease                                                                              |                                                                                                                                                                                                                                                                                                                                                                                                                                                                                                                                                                                                                                                                                                                                                                                                                                                                                                                                                                                                                                                                                                                                                                                                                                                                            |   |                         |                 |                 |                         |                    |   |                         |                                |   |                         |                                      |   |                         |                  |   |                         |                                 |   |                         |                |   |                         |           |   |                         |                          |    |                          |        |    |                          |                 |    |                          |                             |    |                          |         |    |                          |                  |    |                          |                       |
| 10 | morbidities_at_hyst___10                                                           | Cancer                                                                                                |                                                                                                                                                                                                                                                                                                                                                                                                                                                                                                                                                                                                                                                                                                                                                                                                                                                                                                                                                                                                                                                                                                                                                                                                                                                                            |   |                         |                 |                 |                         |                    |   |                         |                                |   |                         |                                      |   |                         |                  |   |                         |                                 |   |                         |                |   |                         |           |   |                         |                          |    |                          |        |    |                          |                 |    |                          |                             |    |                          |         |    |                          |                  |    |                          |                       |
| 11 | morbidities_at_hyst___11                                                           | Anxiety Depress                                                                                       |                                                                                                                                                                                                                                                                                                                                                                                                                                                                                                                                                                                                                                                                                                                                                                                                                                                                                                                                                                                                                                                                                                                                                                                                                                                                            |   |                         |                 |                 |                         |                    |   |                         |                                |   |                         |                                      |   |                         |                  |   |                         |                                 |   |                         |                |   |                         |           |   |                         |                          |    |                          |        |    |                          |                 |    |                          |                             |    |                          |         |    |                          |                  |    |                          |                       |
| 12 | morbidities_at_hyst___12                                                           | Osteoar or degene arthritis                                                                           |                                                                                                                                                                                                                                                                                                                                                                                                                                                                                                                                                                                                                                                                                                                                                                                                                                                                                                                                                                                                                                                                                                                                                                                                                                                                            |   |                         |                 |                 |                         |                    |   |                         |                                |   |                         |                                      |   |                         |                  |   |                         |                                 |   |                         |                |   |                         |           |   |                         |                          |    |                          |        |    |                          |                 |    |                          |                             |    |                          |         |    |                          |                  |    |                          |                       |
| 13 | morbidities_at_hyst___13                                                           | Back pe                                                                                               |                                                                                                                                                                                                                                                                                                                                                                                                                                                                                                                                                                                                                                                                                                                                                                                                                                                                                                                                                                                                                                                                                                                                                                                                                                                                            |   |                         |                 |                 |                         |                    |   |                         |                                |   |                         |                                      |   |                         |                  |   |                         |                                 |   |                         |                |   |                         |           |   |                         |                          |    |                          |        |    |                          |                 |    |                          |                             |    |                          |         |    |                          |                  |    |                          |                       |
| 14 | morbidities_at_hyst___14                                                           | Rheuma arthritis                                                                                      |                                                                                                                                                                                                                                                                                                                                                                                                                                                                                                                                                                                                                                                                                                                                                                                                                                                                                                                                                                                                                                                                                                                                                                                                                                                                            |   |                         |                 |                 |                         |                    |   |                         |                                |   |                         |                                      |   |                         |                  |   |                         |                                 |   |                         |                |   |                         |           |   |                         |                          |    |                          |        |    |                          |                 |    |                          |                             |    |                          |         |    |                          |                  |    |                          |                       |
| 15 | morbidities_at_hyst___15                                                           | Other medical problem                                                                                 |                                                                                                                                                                                                                                                                                                                                                                                                                                                                                                                                                                                                                                                                                                                                                                                                                                                                                                                                                                                                                                                                                                                                                                                                                                                                            |   |                         |                 |                 |                         |                    |   |                         |                                |   |                         |                                      |   |                         |                  |   |                         |                                 |   |                         |                |   |                         |           |   |                         |                          |    |                          |        |    |                          |                 |    |                          |                             |    |                          |         |    |                          |                  |    |                          |                       |
| 25 | other_med_probs<br><br>Show the field ONLY if:<br>[morbidities_at_hyst (15)] = '1' | Please specify other medical problems                                                                 | text, Required<br>Custom alignment: LH<br>Question number: 13a                                                                                                                                                                                                                                                                                                                                                                                                                                                                                                                                                                                                                                                                                                                                                                                                                                                                                                                                                                                                                                                                                                                                                                                                             |   |                         |                 |                 |                         |                    |   |                         |                                |   |                         |                                      |   |                         |                  |   |                         |                                 |   |                         |                |   |                         |           |   |                         |                          |    |                          |        |    |                          |                 |    |                          |                             |    |                          |         |    |                          |                  |    |                          |                       |
| 26 | public_or_pvt_pt                                                                   | Did you have your hysterectomy as a:                                                                  | radio, Required<br><table><tr><td>1</td><td>Public patient</td></tr><tr><td>2</td><td>Private patient</td></tr></table> <div>Custom alignment: LV<br/>Question number: 14</div>                                                                                                                                                                                                                                                                                                                                                                                                                                                                                                                                                                                                                                                                                                                                                                                                                                                                                                                                                                                                                                                                                            | 1 | Public patient          | 2               | Private patient |                         |                    |   |                         |                                |   |                         |                                      |   |                         |                  |   |                         |                                 |   |                         |                |   |                         |           |   |                         |                          |    |                          |        |    |                          |                 |    |                          |                             |    |                          |         |    |                          |                  |    |                          |                       |
| 1  | Public patient                                                                     |                                                                                                       |                                                                                                                                                                                                                                                                                                                                                                                                                                                                                                                                                                                                                                                                                                                                                                                                                                                                                                                                                                                                                                                                                                                                                                                                                                                                            |   |                         |                 |                 |                         |                    |   |                         |                                |   |                         |                                      |   |                         |                  |   |                         |                                 |   |                         |                |   |                         |           |   |                         |                          |    |                          |        |    |                          |                 |    |                          |                             |    |                          |         |    |                          |                  |    |                          |                       |
| 2  | Private patient                                                                    |                                                                                                       |                                                                                                                                                                                                                                                                                                                                                                                                                                                                                                                                                                                                                                                                                                                                                                                                                                                                                                                                                                                                                                                                                                                                                                                                                                                                            |   |                         |                 |                 |                         |                    |   |                         |                                |   |                         |                                      |   |                         |                  |   |                         |                                 |   |                         |                |   |                         |           |   |                         |                          |    |                          |        |    |                          |                 |    |                          |                             |    |                          |         |    |                          |                  |    |                          |                       |
| 27 | gp                                                                                 | General Practioner                                                                                    | checkbox, Required<br><table><tr><td>1</td><td>gp___1</td><td>First suggested</td></tr><tr><td>2</td><td>gp___2</td><td>and/or Informed me</td></tr><tr><td>3</td><td>gp___3</td><td>This info was very influential</td></tr><tr><td>4</td><td>gp___4</td><td>This info was moderately influential</td></tr></table>                                                                                                                                                                                                                                                                                                                                                                                                                                                                                                                                                                                                                                                                                                                                                                                                                                                                                                                                                       | 1 | gp___1                  | First suggested | 2               | gp___2                  | and/or Informed me | 3 | gp___3                  | This info was very influential | 4 | gp___4                  | This info was moderately influential |   |                         |                  |   |                         |                                 |   |                         |                |   |                         |           |   |                         |                          |    |                          |        |    |                          |                 |    |                          |                             |    |                          |         |    |                          |                  |    |                          |                       |
| 1  | gp___1                                                                             | First suggested                                                                                       |                                                                                                                                                                                                                                                                                                                                                                                                                                                                                                                                                                                                                                                                                                                                                                                                                                                                                                                                                                                                                                                                                                                                                                                                                                                                            |   |                         |                 |                 |                         |                    |   |                         |                                |   |                         |                                      |   |                         |                  |   |                         |                                 |   |                         |                |   |                         |           |   |                         |                          |    |                          |        |    |                          |                 |    |                          |                             |    |                          |         |    |                          |                  |    |                          |                       |
| 2  | gp___2                                                                             | and/or Informed me                                                                                    |                                                                                                                                                                                                                                                                                                                                                                                                                                                                                                                                                                                                                                                                                                                                                                                                                                                                                                                                                                                                                                                                                                                                                                                                                                                                            |   |                         |                 |                 |                         |                    |   |                         |                                |   |                         |                                      |   |                         |                  |   |                         |                                 |   |                         |                |   |                         |           |   |                         |                          |    |                          |        |    |                          |                 |    |                          |                             |    |                          |         |    |                          |                  |    |                          |                       |
| 3  | gp___3                                                                             | This info was very influential                                                                        |                                                                                                                                                                                                                                                                                                                                                                                                                                                                                                                                                                                                                                                                                                                                                                                                                                                                                                                                                                                                                                                                                                                                                                                                                                                                            |   |                         |                 |                 |                         |                    |   |                         |                                |   |                         |                                      |   |                         |                  |   |                         |                                 |   |                         |                |   |                         |           |   |                         |                          |    |                          |        |    |                          |                 |    |                          |                             |    |                          |         |    |                          |                  |    |                          |                       |
| 4  | gp___4                                                                             | This info was moderately influential                                                                  |                                                                                                                                                                                                                                                                                                                                                                                                                                                                                                                                                                                                                                                                                                                                                                                                                                                                                                                                                                                                                                                                                                                                                                                                                                                                            |   |                         |                 |                 |                         |                    |   |                         |                                |   |                         |                                      |   |                         |                  |   |                         |                                 |   |                         |                |   |                         |           |   |                         |                          |    |                          |        |    |                          |                 |    |                          |                             |    |                          |         |    |                          |                  |    |                          |                       |

|    |                   |                                      |                                                                                                                                                                                                                                                                                                                                                                                                                                                                                                                                                   |   |                   |                               |   |                   |                    |   |                |                                |   |                |                                      |   |                |                               |   |                |     |
|----|-------------------|--------------------------------------|---------------------------------------------------------------------------------------------------------------------------------------------------------------------------------------------------------------------------------------------------------------------------------------------------------------------------------------------------------------------------------------------------------------------------------------------------------------------------------------------------------------------------------------------------|---|-------------------|-------------------------------|---|-------------------|--------------------|---|----------------|--------------------------------|---|----------------|--------------------------------------|---|----------------|-------------------------------|---|----------------|-----|
|    |                   |                                      | <table border="1"> <tr> <td>5</td><td>gp___5</td><td>This info was not influential</td></tr> <tr> <td>6</td><td>gp___6</td><td>N/A</td></tr> </table> <p>Question number: 15</p>                                                                                                                                                                                                                                                                                                                                                                  | 5 | gp___5            | This info was not influential | 6 | gp___6            | N/A                |   |                |                                |   |                |                                      |   |                |                               |   |                |     |
| 5  | gp___5            | This info was not influential        |                                                                                                                                                                                                                                                                                                                                                                                                                                                                                                                                                   |   |                   |                               |   |                   |                    |   |                |                                |   |                |                                      |   |                |                               |   |                |     |
| 6  | gp___6            | N/A                                  |                                                                                                                                                                                                                                                                                                                                                                                                                                                                                                                                                   |   |                   |                               |   |                   |                    |   |                |                                |   |                |                                      |   |                |                               |   |                |     |
| 28 | obsgyn            | Obstetrician or Gynaecologist        | <p>checkbox, Required</p> <table border="1"> <tr> <td>1</td><td>obsgyn___1</td><td>First suggested</td></tr> <tr> <td>2</td><td>obsgyn___2</td><td>and/or Informed me</td></tr> <tr> <td>3</td><td>obsgyn___3</td><td>This info was very influential</td></tr> <tr> <td>4</td><td>obsgyn___4</td><td>This info was moderately influential</td></tr> <tr> <td>5</td><td>obsgyn___5</td><td>This info was not influential</td></tr> <tr> <td>6</td><td>obsgyn___6</td><td>N/A</td></tr> </table> <p>Question number: 16</p>                         | 1 | obsgyn___1        | First suggested               | 2 | obsgyn___2        | and/or Informed me | 3 | obsgyn___3     | This info was very influential | 4 | obsgyn___4     | This info was moderately influential | 5 | obsgyn___5     | This info was not influential | 6 | obsgyn___6     | N/A |
| 1  | obsgyn___1        | First suggested                      |                                                                                                                                                                                                                                                                                                                                                                                                                                                                                                                                                   |   |                   |                               |   |                   |                    |   |                |                                |   |                |                                      |   |                |                               |   |                |     |
| 2  | obsgyn___2        | and/or Informed me                   |                                                                                                                                                                                                                                                                                                                                                                                                                                                                                                                                                   |   |                   |                               |   |                   |                    |   |                |                                |   |                |                                      |   |                |                               |   |                |     |
| 3  | obsgyn___3        | This info was very influential       |                                                                                                                                                                                                                                                                                                                                                                                                                                                                                                                                                   |   |                   |                               |   |                   |                    |   |                |                                |   |                |                                      |   |                |                               |   |                |     |
| 4  | obsgyn___4        | This info was moderately influential |                                                                                                                                                                                                                                                                                                                                                                                                                                                                                                                                                   |   |                   |                               |   |                   |                    |   |                |                                |   |                |                                      |   |                |                               |   |                |     |
| 5  | obsgyn___5        | This info was not influential        |                                                                                                                                                                                                                                                                                                                                                                                                                                                                                                                                                   |   |                   |                               |   |                   |                    |   |                |                                |   |                |                                      |   |                |                               |   |                |     |
| 6  | obsgyn___6        | N/A                                  |                                                                                                                                                                                                                                                                                                                                                                                                                                                                                                                                                   |   |                   |                               |   |                   |                    |   |                |                                |   |                |                                      |   |                |                               |   |                |     |
| 29 | med_dr            | Other medical doctor                 | <p>checkbox, Required</p> <table border="1"> <tr> <td>1</td><td>med_dr___1</td><td>First suggested</td></tr> <tr> <td>2</td><td>med_dr___2</td><td>and/or Informed me</td></tr> <tr> <td>3</td><td>med_dr___3</td><td>This info was very influential</td></tr> <tr> <td>4</td><td>med_dr___4</td><td>This info was moderately influential</td></tr> <tr> <td>5</td><td>med_dr___5</td><td>This info was not influential</td></tr> <tr> <td>6</td><td>med_dr___6</td><td>N/A</td></tr> </table> <p>Question number: 17</p>                         | 1 | med_dr___1        | First suggested               | 2 | med_dr___2        | and/or Informed me | 3 | med_dr___3     | This info was very influential | 4 | med_dr___4     | This info was moderately influential | 5 | med_dr___5     | This info was not influential | 6 | med_dr___6     | N/A |
| 1  | med_dr___1        | First suggested                      |                                                                                                                                                                                                                                                                                                                                                                                                                                                                                                                                                   |   |                   |                               |   |                   |                    |   |                |                                |   |                |                                      |   |                |                               |   |                |     |
| 2  | med_dr___2        | and/or Informed me                   |                                                                                                                                                                                                                                                                                                                                                                                                                                                                                                                                                   |   |                   |                               |   |                   |                    |   |                |                                |   |                |                                      |   |                |                               |   |                |     |
| 3  | med_dr___3        | This info was very influential       |                                                                                                                                                                                                                                                                                                                                                                                                                                                                                                                                                   |   |                   |                               |   |                   |                    |   |                |                                |   |                |                                      |   |                |                               |   |                |     |
| 4  | med_dr___4        | This info was moderately influential |                                                                                                                                                                                                                                                                                                                                                                                                                                                                                                                                                   |   |                   |                               |   |                   |                    |   |                |                                |   |                |                                      |   |                |                               |   |                |     |
| 5  | med_dr___5        | This info was not influential        |                                                                                                                                                                                                                                                                                                                                                                                                                                                                                                                                                   |   |                   |                               |   |                   |                    |   |                |                                |   |                |                                      |   |                |                               |   |                |     |
| 6  | med_dr___6        | N/A                                  |                                                                                                                                                                                                                                                                                                                                                                                                                                                                                                                                                   |   |                   |                               |   |                   |                    |   |                |                                |   |                |                                      |   |                |                               |   |                |     |
| 30 | spec_nurse        | Specialist nurse                     | <p>checkbox, Required</p> <table border="1"> <tr> <td>1</td><td>spec_nurse___1</td><td>First suggested</td></tr> <tr> <td>2</td><td>spec_nurse___2</td><td>and/or Informed me</td></tr> <tr> <td>3</td><td>spec_nurse___3</td><td>This info was very influential</td></tr> <tr> <td>4</td><td>spec_nurse___4</td><td>This info was moderately influential</td></tr> <tr> <td>5</td><td>spec_nurse___5</td><td>This info was not influential</td></tr> <tr> <td>6</td><td>spec_nurse___6</td><td>N/A</td></tr> </table> <p>Question number: 18</p> | 1 | spec_nurse___1    | First suggested               | 2 | spec_nurse___2    | and/or Informed me | 3 | spec_nurse___3 | This info was very influential | 4 | spec_nurse___4 | This info was moderately influential | 5 | spec_nurse___5 | This info was not influential | 6 | spec_nurse___6 | N/A |
| 1  | spec_nurse___1    | First suggested                      |                                                                                                                                                                                                                                                                                                                                                                                                                                                                                                                                                   |   |                   |                               |   |                   |                    |   |                |                                |   |                |                                      |   |                |                               |   |                |     |
| 2  | spec_nurse___2    | and/or Informed me                   |                                                                                                                                                                                                                                                                                                                                                                                                                                                                                                                                                   |   |                   |                               |   |                   |                    |   |                |                                |   |                |                                      |   |                |                               |   |                |     |
| 3  | spec_nurse___3    | This info was very influential       |                                                                                                                                                                                                                                                                                                                                                                                                                                                                                                                                                   |   |                   |                               |   |                   |                    |   |                |                                |   |                |                                      |   |                |                               |   |                |     |
| 4  | spec_nurse___4    | This info was moderately influential |                                                                                                                                                                                                                                                                                                                                                                                                                                                                                                                                                   |   |                   |                               |   |                   |                    |   |                |                                |   |                |                                      |   |                |                               |   |                |     |
| 5  | spec_nurse___5    | This info was not influential        |                                                                                                                                                                                                                                                                                                                                                                                                                                                                                                                                                   |   |                   |                               |   |                   |                    |   |                |                                |   |                |                                      |   |                |                               |   |                |     |
| 6  | spec_nurse___6    | N/A                                  |                                                                                                                                                                                                                                                                                                                                                                                                                                                                                                                                                   |   |                   |                               |   |                   |                    |   |                |                                |   |                |                                      |   |                |                               |   |                |     |
| 31 | friend_family     | Friends or family                    | <p>checkbox, Required</p> <table border="1"> <tr> <td>1</td><td>friend_family___1</td><td>First suggested</td></tr> <tr> <td>2</td><td>friend_family___2</td><td>and/or Informed me</td></tr> </table>                                                                                                                                                                                                                                                                                                                                            | 1 | friend_family___1 | First suggested               | 2 | friend_family___2 | and/or Informed me |   |                |                                |   |                |                                      |   |                |                               |   |                |     |
| 1  | friend_family___1 | First suggested                      |                                                                                                                                                                                                                                                                                                                                                                                                                                                                                                                                                   |   |                   |                               |   |                   |                    |   |                |                                |   |                |                                      |   |                |                               |   |                |     |
| 2  | friend_family___2 | and/or Informed me                   |                                                                                                                                                                                                                                                                                                                                                                                                                                                                                                                                                   |   |                   |                               |   |                   |                    |   |                |                                |   |                |                                      |   |                |                               |   |                |     |

|    |                   |                                      |                                                                                                                                                                                                                                                                                                                                                                                                                                                                                                                                                   |   |                   |                                |   |                   |                                      |   |                   |                                |   |                   |                                      |   |                |                               |   |                |     |
|----|-------------------|--------------------------------------|---------------------------------------------------------------------------------------------------------------------------------------------------------------------------------------------------------------------------------------------------------------------------------------------------------------------------------------------------------------------------------------------------------------------------------------------------------------------------------------------------------------------------------------------------|---|-------------------|--------------------------------|---|-------------------|--------------------------------------|---|-------------------|--------------------------------|---|-------------------|--------------------------------------|---|----------------|-------------------------------|---|----------------|-----|
|    |                   |                                      | <table border="1"> <tr> <td>3</td><td>friend_family___3</td><td>This info was very influential</td></tr> <tr> <td>4</td><td>friend_family___4</td><td>This info was moderately influential</td></tr> <tr> <td>5</td><td>friend_family___5</td><td>This info was not influential</td></tr> <tr> <td>6</td><td>friend_family___6</td><td>N/A</td></tr> </table> <p>Question number: 19</p>                                                                                                                                                          | 3 | friend_family___3 | This info was very influential | 4 | friend_family___4 | This info was moderately influential | 5 | friend_family___5 | This info was not influential  | 6 | friend_family___6 | N/A                                  |   |                |                               |   |                |     |
| 3  | friend_family___3 | This info was very influential       |                                                                                                                                                                                                                                                                                                                                                                                                                                                                                                                                                   |   |                   |                                |   |                   |                                      |   |                   |                                |   |                   |                                      |   |                |                               |   |                |     |
| 4  | friend_family___4 | This info was moderately influential |                                                                                                                                                                                                                                                                                                                                                                                                                                                                                                                                                   |   |                   |                                |   |                   |                                      |   |                   |                                |   |                   |                                      |   |                |                               |   |                |     |
| 5  | friend_family___5 | This info was not influential        |                                                                                                                                                                                                                                                                                                                                                                                                                                                                                                                                                   |   |                   |                                |   |                   |                                      |   |                   |                                |   |                   |                                      |   |                |                               |   |                |     |
| 6  | friend_family___6 | N/A                                  |                                                                                                                                                                                                                                                                                                                                                                                                                                                                                                                                                   |   |                   |                                |   |                   |                                      |   |                   |                                |   |                   |                                      |   |                |                               |   |                |     |
| 32 | wesbite           | Website                              | <p>checkbox, Required</p> <table border="1"> <tr> <td>1</td><td>wesbite___1</td><td>First suggested</td></tr> <tr> <td>2</td><td>wesbite___2</td><td>and/or Informed me</td></tr> <tr> <td>3</td><td>wesbite___3</td><td>This info was very influential</td></tr> <tr> <td>4</td><td>wesbite___4</td><td>This info was moderately influential</td></tr> <tr> <td>5</td><td>wesbite___5</td><td>This info was not influential</td></tr> <tr> <td>6</td><td>wesbite___6</td><td>N/A</td></tr> </table> <p>Question number: 20</p>                   | 1 | wesbite___1       | First suggested                | 2 | wesbite___2       | and/or Informed me                   | 3 | wesbite___3       | This info was very influential | 4 | wesbite___4       | This info was moderately influential | 5 | wesbite___5    | This info was not influential | 6 | wesbite___6    | N/A |
| 1  | wesbite___1       | First suggested                      |                                                                                                                                                                                                                                                                                                                                                                                                                                                                                                                                                   |   |                   |                                |   |                   |                                      |   |                   |                                |   |                   |                                      |   |                |                               |   |                |     |
| 2  | wesbite___2       | and/or Informed me                   |                                                                                                                                                                                                                                                                                                                                                                                                                                                                                                                                                   |   |                   |                                |   |                   |                                      |   |                   |                                |   |                   |                                      |   |                |                               |   |                |     |
| 3  | wesbite___3       | This info was very influential       |                                                                                                                                                                                                                                                                                                                                                                                                                                                                                                                                                   |   |                   |                                |   |                   |                                      |   |                   |                                |   |                   |                                      |   |                |                               |   |                |     |
| 4  | wesbite___4       | This info was moderately influential |                                                                                                                                                                                                                                                                                                                                                                                                                                                                                                                                                   |   |                   |                                |   |                   |                                      |   |                   |                                |   |                   |                                      |   |                |                               |   |                |     |
| 5  | wesbite___5       | This info was not influential        |                                                                                                                                                                                                                                                                                                                                                                                                                                                                                                                                                   |   |                   |                                |   |                   |                                      |   |                   |                                |   |                   |                                      |   |                |                               |   |                |     |
| 6  | wesbite___6       | N/A                                  |                                                                                                                                                                                                                                                                                                                                                                                                                                                                                                                                                   |   |                   |                                |   |                   |                                      |   |                   |                                |   |                   |                                      |   |                |                               |   |                |     |
| 33 | chat_forum        | Internet chat forum                  | <p>checkbox, Required</p> <table border="1"> <tr> <td>1</td><td>chat_forum___1</td><td>First suggested</td></tr> <tr> <td>2</td><td>chat_forum___2</td><td>and/or Informed me</td></tr> <tr> <td>3</td><td>chat_forum___3</td><td>This info was very influential</td></tr> <tr> <td>4</td><td>chat_forum___4</td><td>This info was moderately influential</td></tr> <tr> <td>5</td><td>chat_forum___5</td><td>This info was not influential</td></tr> <tr> <td>6</td><td>chat_forum___6</td><td>N/A</td></tr> </table> <p>Question number: 21</p> | 1 | chat_forum___1    | First suggested                | 2 | chat_forum___2    | and/or Informed me                   | 3 | chat_forum___3    | This info was very influential | 4 | chat_forum___4    | This info was moderately influential | 5 | chat_forum___5 | This info was not influential | 6 | chat_forum___6 | N/A |
| 1  | chat_forum___1    | First suggested                      |                                                                                                                                                                                                                                                                                                                                                                                                                                                                                                                                                   |   |                   |                                |   |                   |                                      |   |                   |                                |   |                   |                                      |   |                |                               |   |                |     |
| 2  | chat_forum___2    | and/or Informed me                   |                                                                                                                                                                                                                                                                                                                                                                                                                                                                                                                                                   |   |                   |                                |   |                   |                                      |   |                   |                                |   |                   |                                      |   |                |                               |   |                |     |
| 3  | chat_forum___3    | This info was very influential       |                                                                                                                                                                                                                                                                                                                                                                                                                                                                                                                                                   |   |                   |                                |   |                   |                                      |   |                   |                                |   |                   |                                      |   |                |                               |   |                |     |
| 4  | chat_forum___4    | This info was moderately influential |                                                                                                                                                                                                                                                                                                                                                                                                                                                                                                                                                   |   |                   |                                |   |                   |                                      |   |                   |                                |   |                   |                                      |   |                |                               |   |                |     |
| 5  | chat_forum___5    | This info was not influential        |                                                                                                                                                                                                                                                                                                                                                                                                                                                                                                                                                   |   |                   |                                |   |                   |                                      |   |                   |                                |   |                   |                                      |   |                |                               |   |                |     |
| 6  | chat_forum___6    | N/A                                  |                                                                                                                                                                                                                                                                                                                                                                                                                                                                                                                                                   |   |                   |                                |   |                   |                                      |   |                   |                                |   |                   |                                      |   |                |                               |   |                |     |
| 34 | yourself          | Yourself                             | <p>checkbox, Required</p> <table border="1"> <tr> <td>1</td><td>yourself___1</td><td>First suggested</td></tr> <tr> <td>2</td><td>yourself___2</td><td>and/or Informed me</td></tr> <tr> <td>3</td><td>yourself___3</td><td>This info was very influential</td></tr> <tr> <td>4</td><td>yourself___4</td><td>This info was moderately influential</td></tr> <tr> <td>5</td><td>yourself___5</td><td>This info was not influential</td></tr> <tr> <td>6</td><td>yourself___6</td><td>N/A</td></tr> </table> <p>Question number: 22</p>             | 1 | yourself___1      | First suggested                | 2 | yourself___2      | and/or Informed me                   | 3 | yourself___3      | This info was very influential | 4 | yourself___4      | This info was moderately influential | 5 | yourself___5   | This info was not influential | 6 | yourself___6   | N/A |
| 1  | yourself___1      | First suggested                      |                                                                                                                                                                                                                                                                                                                                                                                                                                                                                                                                                   |   |                   |                                |   |                   |                                      |   |                   |                                |   |                   |                                      |   |                |                               |   |                |     |
| 2  | yourself___2      | and/or Informed me                   |                                                                                                                                                                                                                                                                                                                                                                                                                                                                                                                                                   |   |                   |                                |   |                   |                                      |   |                   |                                |   |                   |                                      |   |                |                               |   |                |     |
| 3  | yourself___3      | This info was very influential       |                                                                                                                                                                                                                                                                                                                                                                                                                                                                                                                                                   |   |                   |                                |   |                   |                                      |   |                   |                                |   |                   |                                      |   |                |                               |   |                |     |
| 4  | yourself___4      | This info was moderately influential |                                                                                                                                                                                                                                                                                                                                                                                                                                                                                                                                                   |   |                   |                                |   |                   |                                      |   |                   |                                |   |                   |                                      |   |                |                               |   |                |     |
| 5  | yourself___5      | This info was not influential        |                                                                                                                                                                                                                                                                                                                                                                                                                                                                                                                                                   |   |                   |                                |   |                   |                                      |   |                   |                                |   |                   |                                      |   |                |                               |   |                |     |
| 6  | yourself___6      | N/A                                  |                                                                                                                                                                                                                                                                                                                                                                                                                                                                                                                                                   |   |                   |                                |   |                   |                                      |   |                   |                                |   |                   |                                      |   |                |                               |   |                |     |

|    |                                                                                                    |                                                                                                                                               |                                                                |                                                       |
|----|----------------------------------------------------------------------------------------------------|-----------------------------------------------------------------------------------------------------------------------------------------------|----------------------------------------------------------------|-------------------------------------------------------|
| 35 | other_specify                                                                                      | Other please specify                                                                                                                          | checkbox, Required                                             |                                                       |
|    |                                                                                                    |                                                                                                                                               | 1                                                              | other_specify__1 First suggested                      |
|    |                                                                                                    |                                                                                                                                               | 2                                                              | other_specify__2 and/or Informed me                   |
|    |                                                                                                    |                                                                                                                                               | 3                                                              | other_specify__3 This info was very influential       |
|    |                                                                                                    |                                                                                                                                               | 4                                                              | other_specify__4 This info was moderately influential |
|    |                                                                                                    |                                                                                                                                               | 5                                                              | other_specify__5 This info was not influential        |
|    |                                                                                                    |                                                                                                                                               | 6                                                              | other_specify__6 N/A                                  |
|    |                                                                                                    |                                                                                                                                               | Question number: 23                                            |                                                       |
| 36 | other_info_hyst<br>Show the field ONLY if:<br>[other_specify(1)] = '1' or [other_specify(2)] = '1' | Other specify, please inform us of where you obtained your information from                                                                   | text, Required<br>Custom alignment: LV<br>Question number: 23a |                                                       |
| 37 | how_informed_were_you                                                                              | Looking back now after you have had the hysterectomy, how well informed do you think you were at the time of making the decision to have one? | radio, Required                                                |                                                       |
|    |                                                                                                    |                                                                                                                                               | 1                                                              | Very well informed                                    |
|    |                                                                                                    |                                                                                                                                               | 2                                                              | Fairly well informed                                  |
|    |                                                                                                    |                                                                                                                                               | 3                                                              | Not very well informed                                |
|    |                                                                                                    |                                                                                                                                               | 4                                                              | Not informed at all                                   |
|    |                                                                                                    |                                                                                                                                               | Custom alignment: LV<br>Question number: 24                    |                                                       |
| 38 | health_reasons_for_hyst                                                                            | What were the reasons behind your decision to have a hysterectomy?<br><i>select all that apply</i>                                            | checkbox, Required                                             |                                                       |
|    |                                                                                                    |                                                                                                                                               | 1                                                              | health_reasons_for_hyst__1 Fit canins we              |
|    |                                                                                                    |                                                                                                                                               | 2                                                              | health_reasons_for_hyst__2 Encoce lini oth bo         |
|    |                                                                                                    |                                                                                                                                               | 3                                                              | health_reasons_for_hyst__3 Priute va                  |
|    |                                                                                                    |                                                                                                                                               | 4                                                              | health_reasons_for_hyst__4 Fedis inf of fal an        |
|    |                                                                                                    |                                                                                                                                               | 5                                                              | health_reasons_for_hyst__5 Hythe ute thi ab           |

|    |                                                                                                   |                                                                                                                                                                                 |                                                                                                                                                                                                                                                                                                                                                                                                                                                                                                                                                                                                                                                                                                                                            |   |                            |          |          |                            |              |   |                            |    |            |                            |                 |    |                             |    |    |                             |    |    |                             |    |    |                             |     |    |                             |    |    |                             |          |
|----|---------------------------------------------------------------------------------------------------|---------------------------------------------------------------------------------------------------------------------------------------------------------------------------------|--------------------------------------------------------------------------------------------------------------------------------------------------------------------------------------------------------------------------------------------------------------------------------------------------------------------------------------------------------------------------------------------------------------------------------------------------------------------------------------------------------------------------------------------------------------------------------------------------------------------------------------------------------------------------------------------------------------------------------------------|---|----------------------------|----------|----------|----------------------------|--------------|---|----------------------------|----|------------|----------------------------|-----------------|----|-----------------------------|----|----|-----------------------------|----|----|-----------------------------|----|----|-----------------------------|-----|----|-----------------------------|----|----|-----------------------------|----------|
|    |                                                                                                   |                                                                                                                                                                                 | <table><tr><td>6</td><td>health_reasons_for_hyst__6</td><td>He<br/>me</td></tr><tr><td>7</td><td>health_reasons_for_hyst__7</td><td>Bl<br/>me</td></tr><tr><td>8</td><td>health_reasons_for_hyst__8</td><td>Se</td></tr><tr><td>9</td><td>health_reasons_for_hyst__9</td><td>Fa<br/>ov<br/>ute</td></tr><tr><td>10</td><td>health_reasons_for_hyst__10</td><td>Ab</td></tr><tr><td>11</td><td>health_reasons_for_hyst__11</td><td>Ca</td></tr><tr><td>12</td><td>health_reasons_for_hyst__12</td><td>Pe</td></tr><tr><td>13</td><td>health_reasons_for_hyst__13</td><td>Bir</td></tr><tr><td>14</td><td>health_reasons_for_hyst__14</td><td>De</td></tr><tr><td>15</td><td>health_reasons_for_hyst__15</td><td>Ot<br/>sp</td></tr></table> | 6 | health_reasons_for_hyst__6 | He<br>me | 7        | health_reasons_for_hyst__7 | Bl<br>me     | 8 | health_reasons_for_hyst__8 | Se | 9          | health_reasons_for_hyst__9 | Fa<br>ov<br>ute | 10 | health_reasons_for_hyst__10 | Ab | 11 | health_reasons_for_hyst__11 | Ca | 12 | health_reasons_for_hyst__12 | Pe | 13 | health_reasons_for_hyst__13 | Bir | 14 | health_reasons_for_hyst__14 | De | 15 | health_reasons_for_hyst__15 | Ot<br>sp |
| 6  | health_reasons_for_hyst__6                                                                        | He<br>me                                                                                                                                                                        |                                                                                                                                                                                                                                                                                                                                                                                                                                                                                                                                                                                                                                                                                                                                            |   |                            |          |          |                            |              |   |                            |    |            |                            |                 |    |                             |    |    |                             |    |    |                             |    |    |                             |     |    |                             |    |    |                             |          |
| 7  | health_reasons_for_hyst__7                                                                        | Bl<br>me                                                                                                                                                                        |                                                                                                                                                                                                                                                                                                                                                                                                                                                                                                                                                                                                                                                                                                                                            |   |                            |          |          |                            |              |   |                            |    |            |                            |                 |    |                             |    |    |                             |    |    |                             |    |    |                             |     |    |                             |    |    |                             |          |
| 8  | health_reasons_for_hyst__8                                                                        | Se                                                                                                                                                                              |                                                                                                                                                                                                                                                                                                                                                                                                                                                                                                                                                                                                                                                                                                                                            |   |                            |          |          |                            |              |   |                            |    |            |                            |                 |    |                             |    |    |                             |    |    |                             |    |    |                             |     |    |                             |    |    |                             |          |
| 9  | health_reasons_for_hyst__9                                                                        | Fa<br>ov<br>ute                                                                                                                                                                 |                                                                                                                                                                                                                                                                                                                                                                                                                                                                                                                                                                                                                                                                                                                                            |   |                            |          |          |                            |              |   |                            |    |            |                            |                 |    |                             |    |    |                             |    |    |                             |    |    |                             |     |    |                             |    |    |                             |          |
| 10 | health_reasons_for_hyst__10                                                                       | Ab                                                                                                                                                                              |                                                                                                                                                                                                                                                                                                                                                                                                                                                                                                                                                                                                                                                                                                                                            |   |                            |          |          |                            |              |   |                            |    |            |                            |                 |    |                             |    |    |                             |    |    |                             |    |    |                             |     |    |                             |    |    |                             |          |
| 11 | health_reasons_for_hyst__11                                                                       | Ca                                                                                                                                                                              |                                                                                                                                                                                                                                                                                                                                                                                                                                                                                                                                                                                                                                                                                                                                            |   |                            |          |          |                            |              |   |                            |    |            |                            |                 |    |                             |    |    |                             |    |    |                             |    |    |                             |     |    |                             |    |    |                             |          |
| 12 | health_reasons_for_hyst__12                                                                       | Pe                                                                                                                                                                              |                                                                                                                                                                                                                                                                                                                                                                                                                                                                                                                                                                                                                                                                                                                                            |   |                            |          |          |                            |              |   |                            |    |            |                            |                 |    |                             |    |    |                             |    |    |                             |    |    |                             |     |    |                             |    |    |                             |          |
| 13 | health_reasons_for_hyst__13                                                                       | Bir                                                                                                                                                                             |                                                                                                                                                                                                                                                                                                                                                                                                                                                                                                                                                                                                                                                                                                                                            |   |                            |          |          |                            |              |   |                            |    |            |                            |                 |    |                             |    |    |                             |    |    |                             |    |    |                             |     |    |                             |    |    |                             |          |
| 14 | health_reasons_for_hyst__14                                                                       | De                                                                                                                                                                              |                                                                                                                                                                                                                                                                                                                                                                                                                                                                                                                                                                                                                                                                                                                                            |   |                            |          |          |                            |              |   |                            |    |            |                            |                 |    |                             |    |    |                             |    |    |                             |    |    |                             |     |    |                             |    |    |                             |          |
| 15 | health_reasons_for_hyst__15                                                                       | Ot<br>sp                                                                                                                                                                        |                                                                                                                                                                                                                                                                                                                                                                                                                                                                                                                                                                                                                                                                                                                                            |   |                            |          |          |                            |              |   |                            |    |            |                            |                 |    |                             |    |    |                             |    |    |                             |    |    |                             |     |    |                             |    |    |                             |          |
|    |                                                                                                   |                                                                                                                                                                                 | Custom alignment: LV<br>Question number: 25                                                                                                                                                                                                                                                                                                                                                                                                                                                                                                                                                                                                                                                                                                |   |                            |          |          |                            |              |   |                            |    |            |                            |                 |    |                             |    |    |                             |    |    |                             |    |    |                             |     |    |                             |    |    |                             |          |
| 39 | other_reason_for_hyst<br>st<br><br>Show the field ONLY if:<br>[health_reasons_for_hyst(15)] = '1' | Other reason please specify                                                                                                                                                     | text, Required<br>Custom alignment: LV<br>Question number: 25a                                                                                                                                                                                                                                                                                                                                                                                                                                                                                                                                                                                                                                                                             |   |                            |          |          |                            |              |   |                            |    |            |                            |                 |    |                             |    |    |                             |    |    |                             |    |    |                             |     |    |                             |    |    |                             |          |
| 40 | symptoms_b4_hyst                                                                                  | For how many MONTHS did you have symptoms or health issues (if any) before you decided you needed/agreed to have a hysterectomy?<br><i>enter 0 if no symptoms/health issues</i> | text (number), Required<br>Custom alignment: LV<br>Question number: 26                                                                                                                                                                                                                                                                                                                                                                                                                                                                                                                                                                                                                                                                     |   |                            |          |          |                            |              |   |                            |    |            |                            |                 |    |                             |    |    |                             |    |    |                             |    |    |                             |     |    |                             |    |    |                             |          |
| 41 | alleviating                                                                                       | Alleviating symptoms                                                                                                                                                            | radio (Matrix), Required<br><table><tr><td>1</td><td>Very much</td></tr><tr><td>2</td><td>Somewhat</td></tr><tr><td>3</td><td>Don't recall</td></tr><tr><td>4</td><td>Not really</td></tr><tr><td>5</td><td>Not at all</td></tr></table><br>Question number: 27                                                                                                                                                                                                                                                                                                                                                                                                                                                                            | 1 | Very much                  | 2        | Somewhat | 3                          | Don't recall | 4 | Not really                 | 5  | Not at all |                            |                 |    |                             |    |    |                             |    |    |                             |    |    |                             |     |    |                             |    |    |                             |          |
| 1  | Very much                                                                                         |                                                                                                                                                                                 |                                                                                                                                                                                                                                                                                                                                                                                                                                                                                                                                                                                                                                                                                                                                            |   |                            |          |          |                            |              |   |                            |    |            |                            |                 |    |                             |    |    |                             |    |    |                             |    |    |                             |     |    |                             |    |    |                             |          |
| 2  | Somewhat                                                                                          |                                                                                                                                                                                 |                                                                                                                                                                                                                                                                                                                                                                                                                                                                                                                                                                                                                                                                                                                                            |   |                            |          |          |                            |              |   |                            |    |            |                            |                 |    |                             |    |    |                             |    |    |                             |    |    |                             |     |    |                             |    |    |                             |          |
| 3  | Don't recall                                                                                      |                                                                                                                                                                                 |                                                                                                                                                                                                                                                                                                                                                                                                                                                                                                                                                                                                                                                                                                                                            |   |                            |          |          |                            |              |   |                            |    |            |                            |                 |    |                             |    |    |                             |    |    |                             |    |    |                             |     |    |                             |    |    |                             |          |
| 4  | Not really                                                                                        |                                                                                                                                                                                 |                                                                                                                                                                                                                                                                                                                                                                                                                                                                                                                                                                                                                                                                                                                                            |   |                            |          |          |                            |              |   |                            |    |            |                            |                 |    |                             |    |    |                             |    |    |                             |    |    |                             |     |    |                             |    |    |                             |          |
| 5  | Not at all                                                                                        |                                                                                                                                                                                 |                                                                                                                                                                                                                                                                                                                                                                                                                                                                                                                                                                                                                                                                                                                                            |   |                            |          |          |                            |              |   |                            |    |            |                            |                 |    |                             |    |    |                             |    |    |                             |    |    |                             |     |    |                             |    |    |                             |          |
| 42 | solving                                                                                           | Solving medical problem                                                                                                                                                         | radio (Matrix), Required<br><table><tr><td>1</td><td>Very much</td></tr><tr><td>2</td><td>Somewhat</td></tr><tr><td>3</td><td>Don't recall</td></tr><tr><td>4</td><td>Not really</td></tr><tr><td>5</td><td>Not at all</td></tr></table><br>Question number: 28                                                                                                                                                                                                                                                                                                                                                                                                                                                                            | 1 | Very much                  | 2        | Somewhat | 3                          | Don't recall | 4 | Not really                 | 5  | Not at all |                            |                 |    |                             |    |    |                             |    |    |                             |    |    |                             |     |    |                             |    |    |                             |          |
| 1  | Very much                                                                                         |                                                                                                                                                                                 |                                                                                                                                                                                                                                                                                                                                                                                                                                                                                                                                                                                                                                                                                                                                            |   |                            |          |          |                            |              |   |                            |    |            |                            |                 |    |                             |    |    |                             |    |    |                             |    |    |                             |     |    |                             |    |    |                             |          |
| 2  | Somewhat                                                                                          |                                                                                                                                                                                 |                                                                                                                                                                                                                                                                                                                                                                                                                                                                                                                                                                                                                                                                                                                                            |   |                            |          |          |                            |              |   |                            |    |            |                            |                 |    |                             |    |    |                             |    |    |                             |    |    |                             |     |    |                             |    |    |                             |          |
| 3  | Don't recall                                                                                      |                                                                                                                                                                                 |                                                                                                                                                                                                                                                                                                                                                                                                                                                                                                                                                                                                                                                                                                                                            |   |                            |          |          |                            |              |   |                            |    |            |                            |                 |    |                             |    |    |                             |    |    |                             |    |    |                             |     |    |                             |    |    |                             |          |
| 4  | Not really                                                                                        |                                                                                                                                                                                 |                                                                                                                                                                                                                                                                                                                                                                                                                                                                                                                                                                                                                                                                                                                                            |   |                            |          |          |                            |              |   |                            |    |            |                            |                 |    |                             |    |    |                             |    |    |                             |    |    |                             |     |    |                             |    |    |                             |          |
| 5  | Not at all                                                                                        |                                                                                                                                                                                 |                                                                                                                                                                                                                                                                                                                                                                                                                                                                                                                                                                                                                                                                                                                                            |   |                            |          |          |                            |              |   |                            |    |            |                            |                 |    |                             |    |    |                             |    |    |                             |    |    |                             |     |    |                             |    |    |                             |          |
| 43 | lifestyle                                                                                         | Lifestyle                                                                                                                                                                       | radio (Matrix), Required<br><table><tr><td>1</td><td>Very much</td></tr><tr><td>2</td><td>Somewhat</td></tr><tr><td>3</td><td>Don't recall</td></tr><tr><td>4</td><td>Not really</td></tr><tr><td>5</td><td>Not at all</td></tr></table>                                                                                                                                                                                                                                                                                                                                                                                                                                                                                                   | 1 | Very much                  | 2        | Somewhat | 3                          | Don't recall | 4 | Not really                 | 5  | Not at all |                            |                 |    |                             |    |    |                             |    |    |                             |    |    |                             |     |    |                             |    |    |                             |          |
| 1  | Very much                                                                                         |                                                                                                                                                                                 |                                                                                                                                                                                                                                                                                                                                                                                                                                                                                                                                                                                                                                                                                                                                            |   |                            |          |          |                            |              |   |                            |    |            |                            |                 |    |                             |    |    |                             |    |    |                             |    |    |                             |     |    |                             |    |    |                             |          |
| 2  | Somewhat                                                                                          |                                                                                                                                                                                 |                                                                                                                                                                                                                                                                                                                                                                                                                                                                                                                                                                                                                                                                                                                                            |   |                            |          |          |                            |              |   |                            |    |            |                            |                 |    |                             |    |    |                             |    |    |                             |    |    |                             |     |    |                             |    |    |                             |          |
| 3  | Don't recall                                                                                      |                                                                                                                                                                                 |                                                                                                                                                                                                                                                                                                                                                                                                                                                                                                                                                                                                                                                                                                                                            |   |                            |          |          |                            |              |   |                            |    |            |                            |                 |    |                             |    |    |                             |    |    |                             |    |    |                             |     |    |                             |    |    |                             |          |
| 4  | Not really                                                                                        |                                                                                                                                                                                 |                                                                                                                                                                                                                                                                                                                                                                                                                                                                                                                                                                                                                                                                                                                                            |   |                            |          |          |                            |              |   |                            |    |            |                            |                 |    |                             |    |    |                             |    |    |                             |    |    |                             |     |    |                             |    |    |                             |          |
| 5  | Not at all                                                                                        |                                                                                                                                                                                 |                                                                                                                                                                                                                                                                                                                                                                                                                                                                                                                                                                                                                                                                                                                                            |   |                            |          |          |                            |              |   |                            |    |            |                            |                 |    |                             |    |    |                             |    |    |                             |    |    |                             |     |    |                             |    |    |                             |          |



|    |                                                                                                               |                                                                                                           |                                                                                                                                                                                                                                                                               |   |                      |                                                    |          |   |              |   |            |   |            |
|----|---------------------------------------------------------------------------------------------------------------|-----------------------------------------------------------------------------------------------------------|-------------------------------------------------------------------------------------------------------------------------------------------------------------------------------------------------------------------------------------------------------------------------------|---|----------------------|----------------------------------------------------|----------|---|--------------|---|------------|---|------------|
|    |                                                                                                               |                                                                                                           | Question number: 29                                                                                                                                                                                                                                                           |   |                      |                                                    |          |   |              |   |            |   |            |
| 44 | hormone_levels                                                                                                | Change to hormone levels                                                                                  | radio (Matrix), Required<br><table border="1"> <tr><td>1</td><td>Very much</td></tr> <tr><td>2</td><td>Somewhat</td></tr> <tr><td>3</td><td>Don't recall</td></tr> <tr><td>4</td><td>Not really</td></tr> <tr><td>5</td><td>Not at all</td></tr> </table> Question number: 30 | 1 | Very much            | 2                                                  | Somewhat | 3 | Don't recall | 4 | Not really | 5 | Not at all |
| 1  | Very much                                                                                                     |                                                                                                           |                                                                                                                                                                                                                                                                               |   |                      |                                                    |          |   |              |   |            |   |            |
| 2  | Somewhat                                                                                                      |                                                                                                           |                                                                                                                                                                                                                                                                               |   |                      |                                                    |          |   |              |   |            |   |            |
| 3  | Don't recall                                                                                                  |                                                                                                           |                                                                                                                                                                                                                                                                               |   |                      |                                                    |          |   |              |   |            |   |            |
| 4  | Not really                                                                                                    |                                                                                                           |                                                                                                                                                                                                                                                                               |   |                      |                                                    |          |   |              |   |            |   |            |
| 5  | Not at all                                                                                                    |                                                                                                           |                                                                                                                                                                                                                                                                               |   |                      |                                                    |          |   |              |   |            |   |            |
| 45 | avoid_cancer                                                                                                  | Avoiding cancer                                                                                           | radio (Matrix), Required<br><table border="1"> <tr><td>1</td><td>Very much</td></tr> <tr><td>2</td><td>Somewhat</td></tr> <tr><td>3</td><td>Don't recall</td></tr> <tr><td>4</td><td>Not really</td></tr> <tr><td>5</td><td>Not at all</td></tr> </table> Question number: 31 | 1 | Very much            | 2                                                  | Somewhat | 3 | Don't recall | 4 | Not really | 5 | Not at all |
| 1  | Very much                                                                                                     |                                                                                                           |                                                                                                                                                                                                                                                                               |   |                      |                                                    |          |   |              |   |            |   |            |
| 2  | Somewhat                                                                                                      |                                                                                                           |                                                                                                                                                                                                                                                                               |   |                      |                                                    |          |   |              |   |            |   |            |
| 3  | Don't recall                                                                                                  |                                                                                                           |                                                                                                                                                                                                                                                                               |   |                      |                                                    |          |   |              |   |            |   |            |
| 4  | Not really                                                                                                    |                                                                                                           |                                                                                                                                                                                                                                                                               |   |                      |                                                    |          |   |              |   |            |   |            |
| 5  | Not at all                                                                                                    |                                                                                                           |                                                                                                                                                                                                                                                                               |   |                      |                                                    |          |   |              |   |            |   |            |
| 46 | treat_cancer                                                                                                  | Treating cancer                                                                                           | radio (Matrix), Required<br><table border="1"> <tr><td>1</td><td>Very much</td></tr> <tr><td>2</td><td>Somewhat</td></tr> <tr><td>3</td><td>Don't recall</td></tr> <tr><td>4</td><td>Not really</td></tr> <tr><td>5</td><td>Not at all</td></tr> </table> Question number: 32 | 1 | Very much            | 2                                                  | Somewhat | 3 | Don't recall | 4 | Not really | 5 | Not at all |
| 1  | Very much                                                                                                     |                                                                                                           |                                                                                                                                                                                                                                                                               |   |                      |                                                    |          |   |              |   |            |   |            |
| 2  | Somewhat                                                                                                      |                                                                                                           |                                                                                                                                                                                                                                                                               |   |                      |                                                    |          |   |              |   |            |   |            |
| 3  | Don't recall                                                                                                  |                                                                                                           |                                                                                                                                                                                                                                                                               |   |                      |                                                    |          |   |              |   |            |   |            |
| 4  | Not really                                                                                                    |                                                                                                           |                                                                                                                                                                                                                                                                               |   |                      |                                                    |          |   |              |   |            |   |            |
| 5  | Not at all                                                                                                    |                                                                                                           |                                                                                                                                                                                                                                                                               |   |                      |                                                    |          |   |              |   |            |   |            |
| 47 | other                                                                                                         | Other (please specify other reason if any)                                                                | radio (Matrix)<br><table border="1"> <tr><td>1</td><td>Very much</td></tr> <tr><td>2</td><td>Somewhat</td></tr> <tr><td>3</td><td>Don't recall</td></tr> <tr><td>4</td><td>Not really</td></tr> <tr><td>5</td><td>Not at all</td></tr> </table> Question number: 33           | 1 | Very much            | 2                                                  | Somewhat | 3 | Don't recall | 4 | Not really | 5 | Not at all |
| 1  | Very much                                                                                                     |                                                                                                           |                                                                                                                                                                                                                                                                               |   |                      |                                                    |          |   |              |   |            |   |            |
| 2  | Somewhat                                                                                                      |                                                                                                           |                                                                                                                                                                                                                                                                               |   |                      |                                                    |          |   |              |   |            |   |            |
| 3  | Don't recall                                                                                                  |                                                                                                           |                                                                                                                                                                                                                                                                               |   |                      |                                                    |          |   |              |   |            |   |            |
| 4  | Not really                                                                                                    |                                                                                                           |                                                                                                                                                                                                                                                                               |   |                      |                                                    |          |   |              |   |            |   |            |
| 5  | Not at all                                                                                                    |                                                                                                           |                                                                                                                                                                                                                                                                               |   |                      |                                                    |          |   |              |   |            |   |            |
| 48 | reason_for_hyst<br><small>Show the field ONLY if:<br/>[other] = '1' or [other] = '2' or [other] = '4'</small> | Other reason for deciding to have a hysterectomy                                                          | text, Required<br>Custom alignment: LV<br>Question number: 33a                                                                                                                                                                                                                |   |                      |                                                    |          |   |              |   |            |   |            |
| 49 | aware_other_hyst_methods                                                                                      | Were you aware that there are several possible surgical methods by which a hysterectomy can be performed? | yesno, Required<br><table border="1"> <tr><td>1</td><td>Yes</td></tr> <tr><td>0</td><td>No</td></tr> </table> Custom alignment: LV<br>Question number: 34                                                                                                                     | 1 | Yes                  | 0                                                  | No       |   |              |   |            |   |            |
| 1  | Yes                                                                                                           |                                                                                                           |                                                                                                                                                                                                                                                                               |   |                      |                                                    |          |   |              |   |            |   |            |
| 0  | No                                                                                                            |                                                                                                           |                                                                                                                                                                                                                                                                               |   |                      |                                                    |          |   |              |   |            |   |            |
| 50 | what_hyst_methods<br><small>Show the field ONLY if:<br/>[aware_other_hyst_methods] = '1'</small>              | If yes, what methods do you know about?<br><i>select all that apply</i>                                   | checkbox, Required<br><table border="1"> <tr> <td>1</td> <td>what_hyst_methods__1</td> <td>Open Abdominal Hysterectomy (long cut, horizontal)</td> </tr> </table>                                                                                                             | 1 | what_hyst_methods__1 | Open Abdominal Hysterectomy (long cut, horizontal) |          |   |              |   |            |   |            |
| 1  | what_hyst_methods__1                                                                                          | Open Abdominal Hysterectomy (long cut, horizontal)                                                        |                                                                                                                                                                                                                                                                               |   |                      |                                                    |          |   |              |   |            |   |            |

|    |                                                                                |                                                                                                                                                                                    |                                                                 |                      |                                                                                                                      |
|----|--------------------------------------------------------------------------------|------------------------------------------------------------------------------------------------------------------------------------------------------------------------------------|-----------------------------------------------------------------|----------------------|----------------------------------------------------------------------------------------------------------------------|
|    |                                                                                |                                                                                                                                                                                    |                                                                 |                      | vertical at abdomen                                                                                                  |
|    |                                                                                |                                                                                                                                                                                    | 2                                                               | what_hyst_methods__2 | Vaginal Hysterectomy (all performed through the vagina, not the abdomen)                                             |
|    |                                                                                |                                                                                                                                                                                    | 3                                                               | what_hyst_methods__3 | Total Laparoscopic Hysterectomy (all performed through the keyhole in the abdomen)                                   |
|    |                                                                                |                                                                                                                                                                                    | 4                                                               | what_hyst_methods__4 | Laparoscopically Assisted Vaginal Hysterectomy (performed through the keyhole in the abdomen and through the vagina) |
|    |                                                                                |                                                                                                                                                                                    | 5                                                               | what_hyst_methods__5 | Robotic Hysterectomy (using tools attached to a robotic arm controlled by a surgeon and a computer)                  |
|    |                                                                                |                                                                                                                                                                                    | Custom alignment: LV<br>Question number: 34a                    |                      |                                                                                                                      |
| 51 | knowledge_tah<br>Show the field ONLY if:<br>[what_hyst_methods (1)] = '1'      | Open abdominal hysterectomy - what do you think or know are the advantages and disadvantages of this type of hysterectomy?<br><i>there are no wrong answers</i>                    | text, Required<br>Custom alignment: LV<br>Question number: 34a1 |                      |                                                                                                                      |
| 52 | knowledge_vag_hyst<br>Show the field ONLY if:<br>[what_hyst_methods (2)] = '1' | Vaginal Hysterectomy - what do you think or know are the advantages and disadvantages of this type of hysterectomy?<br><i>there are no wrong answers</i>                           | text, Required<br>Custom alignment: LV<br>Question number: 34a2 |                      |                                                                                                                      |
| 53 | knowledge_tlh<br>Show the field ONLY if:<br>[what_hyst_methods (3)] = '1'      | Total Laparoscopic Hysterectomy - what do you think or know are the advantages and disadvantages of this type of hysterectomy?<br><i>there are no wrong answers</i>                | text, Required<br>Custom alignment: LV<br>Question number: 34a3 |                      |                                                                                                                      |
| 54 | knowledge_lavh<br>Show the field ONLY if:<br>[what_hyst_methods (4)] = '1'     | Laparoscopically assisted vaginal hysterectomy - what do you think or know are the advantages and disadvantages of this type of hysterectomy?<br><i>there are no wrong answers</i> | text, Required<br>Custom alignment: LV<br>Question number: 34a4 |                      |                                                                                                                      |
| 55 | knowledge_robotic<br>Show the field ONLY if:<br>[what_hyst_methods (5)] = '1'  | Robotic hysterectomy - what do you think or know are the advantages and disadvantages of this type of hysterectomy?<br><i>there are no wrong answers</i>                           | text, Required<br>Custom alignment: LV<br>Question number: 34a5 |                      |                                                                                                                      |
| 56 | pt_preference_hyst                                                             | Did you have a preference for a particular type of hysterectomy?                                                                                                                   | yesno, Required<br>1 Yes                                        |                      |                                                                                                                      |

|    |                                                                                                      |                                                                                                       |                                                                                                                                                                                                                                                                                                                                                                                                                                                                                                                                                                                                                                                                                                                                                                                                                                                                                        |
|----|------------------------------------------------------------------------------------------------------|-------------------------------------------------------------------------------------------------------|----------------------------------------------------------------------------------------------------------------------------------------------------------------------------------------------------------------------------------------------------------------------------------------------------------------------------------------------------------------------------------------------------------------------------------------------------------------------------------------------------------------------------------------------------------------------------------------------------------------------------------------------------------------------------------------------------------------------------------------------------------------------------------------------------------------------------------------------------------------------------------------|
|    |                                                                                                      |                                                                                                       | <div><div>0</div><div>No</div></div> <div>Custom alignment: LV<br/>Question number: 35</div>                                                                                                                                                                                                                                                                                                                                                                                                                                                                                                                                                                                                                                                                                                                                                                                           |
| 57 | <div>type_of_hyst_preference</div> <div>Show the field ONLY if:<br/>[pt_preference_hyst] = '1'</div> | <div>Which type of hysterectomy did you have a preference for?</div> <div>select all that apply</div> | <div>checkbox, Required</div> <div><div><div>1</div><div>type_of_hyst_preference__1</div><div>Open Abdominal Hysterectomy (long horizontal incision on the abdomen)</div></div><div><div>2</div><div>type_of_hyst_preference__2</div><div>Vaginal Hysterectomy (all performed through the vagina)</div></div><div><div>3</div><div>type_of_hyst_preference__3</div><div>Total Laparoscopic Hysterectomy (all performed through keyhole incisions on the abdomen)</div></div><div><div>4</div><div>type_of_hyst_preference__4</div><div>Laparoscopically Assisted Vaginal Hysterectomy (performed through keyhole incisions on the abdomen and the vagina)</div></div><div><div>5</div><div>type_of_hyst_preference__5</div><div>Robotic Hysterectomy (using an attached robotic arm to perform the surgery)</div></div></div> <div>Custom alignment: LV<br/>Question number: 35a</div> |
| 58 | <div>pref_tah_why</div> <div>Show the field ONLY if:<br/>[type_of_hyst_preference(1)] = '1'</div>    | <div>Why did you have a preference for the Open Abdominal Hysterectomy?</div>                         | <div>text, Required</div> <div>Custom alignment: LV<br/>Question number: 35a1</div>                                                                                                                                                                                                                                                                                                                                                                                                                                                                                                                                                                                                                                                                                                                                                                                                    |
| 59 | <div>pref_vag_why</div> <div>Show the field ONLY if:<br/>[type_of_hyst_preference(2)] = '1'</div>    | <div>Why did you have a preference for the Vaginal Hysterectomy?</div>                                | <div>text, Required</div> <div>Custom alignment: LV<br/>Question number: 35a2</div>                                                                                                                                                                                                                                                                                                                                                                                                                                                                                                                                                                                                                                                                                                                                                                                                    |
| 60 | <div>pref_tlh_why</div> <div>Show the field ONLY if:<br/>[type_of_hyst_preference(3)] = '1'</div>    | <div>Why did you have a preference for the Total Laparoscopic Hysterectomy?</div>                     | <div>text, Required</div> <div>Custom alignment: LV<br/>Question number: 35a3</div>                                                                                                                                                                                                                                                                                                                                                                                                                                                                                                                                                                                                                                                                                                                                                                                                    |
| 61 | <div>pref_lavh_why</div> <div>Show the field ONLY if:<br/>[type_of_hyst_preference(4)] = '1'</div>   | <div>Why did you have a preference for the Laparoscopically Assisted Vaginal Hysterectomy?</div>      | <div>text, Required</div> <div>Custom alignment: LV<br/>Question number: 35a4</div>                                                                                                                                                                                                                                                                                                                                                                                                                                                                                                                                                                                                                                                                                                                                                                                                    |

|    |                                                                                               |                                                                                                         |                                                                                                                                                                                                                                                                                                                                                                                                                                                                                                                                                                                                                                                                                                  |   |                            |                                          |    |                            |                                  |   |                            |                                             |   |                            |                                                                             |   |                            |                                                   |
|----|-----------------------------------------------------------------------------------------------|---------------------------------------------------------------------------------------------------------|--------------------------------------------------------------------------------------------------------------------------------------------------------------------------------------------------------------------------------------------------------------------------------------------------------------------------------------------------------------------------------------------------------------------------------------------------------------------------------------------------------------------------------------------------------------------------------------------------------------------------------------------------------------------------------------------------|---|----------------------------|------------------------------------------|----|----------------------------|----------------------------------|---|----------------------------|---------------------------------------------|---|----------------------------|-----------------------------------------------------------------------------|---|----------------------------|---------------------------------------------------|
|    | [type_of_hyst_preference(4)] = '1'                                                            |                                                                                                         |                                                                                                                                                                                                                                                                                                                                                                                                                                                                                                                                                                                                                                                                                                  |   |                            |                                          |    |                            |                                  |   |                            |                                             |   |                            |                                                                             |   |                            |                                                   |
| 62 | <p>pref_robotic_why</p> <p>Show the field ONLY if:<br/>[type_of_hyst_preference(5)] = '1'</p> | Why did you have a preference for the Robotic Hysterectomy?                                             | <p>text, Required</p> <p>Custom alignment: LV</p> <p>Question number: 35a5</p>                                                                                                                                                                                                                                                                                                                                                                                                                                                                                                                                                                                                                   |   |                            |                                          |    |                            |                                  |   |                            |                                             |   |                            |                                                                             |   |                            |                                                   |
| 63 | choose_dr_on_hysts                                                                            | Did you choose your Doctor based on what types of hysterectomy they perform?                            | <p>yesno, Required</p> <table border="1"> <tr> <td>1</td><td>Yes</td></tr> <tr> <td>0</td><td>No</td></tr> </table> <p>Custom alignment: LV</p> <p>Question number: 36</p>                                                                                                                                                                                                                                                                                                                                                                                                                                                                                                                       | 1 | Yes                        | 0                                        | No |                            |                                  |   |                            |                                             |   |                            |                                                                             |   |                            |                                                   |
| 1  | Yes                                                                                           |                                                                                                         |                                                                                                                                                                                                                                                                                                                                                                                                                                                                                                                                                                                                                                                                                                  |   |                            |                                          |    |                            |                                  |   |                            |                                             |   |                            |                                                                             |   |                            |                                                   |
| 0  | No                                                                                            |                                                                                                         |                                                                                                                                                                                                                                                                                                                                                                                                                                                                                                                                                                                                                                                                                                  |   |                            |                                          |    |                            |                                  |   |                            |                                             |   |                            |                                                                             |   |                            |                                                   |
| 64 | dr_recommend_hyst_type                                                                        | <p>What type/s of hysterectomy did your Doctor recommend?</p> <p><i>select all that apply</i></p>       | <p>checkbox, Required</p> <table border="1"> <tr> <td>1</td><td>dr_recommend_hyst_type___1</td><td>Open Abdominal Hysterectomy (laparotomy)</td></tr> <tr> <td>2</td><td>dr_recommend_hyst_type___2</td><td>Vaginal Hysterectomy (all types)</td></tr> <tr> <td>3</td><td>dr_recommend_hyst_type___3</td><td>Total Laparoscopic Hysterectomy (all types)</td></tr> <tr> <td>4</td><td>dr_recommend_hyst_type___4</td><td>Laparoscopic Assisted Vaginal Hysterectomy (peritoneal keyhole and vaginal)</td></tr> <tr> <td>5</td><td>dr_recommend_hyst_type___5</td><td>Robotic Hysterectomy (using robotic surgical arm)</td></tr> </table> <p>Custom alignment: LV</p> <p>Question number: 37</p> | 1 | dr_recommend_hyst_type___1 | Open Abdominal Hysterectomy (laparotomy) | 2  | dr_recommend_hyst_type___2 | Vaginal Hysterectomy (all types) | 3 | dr_recommend_hyst_type___3 | Total Laparoscopic Hysterectomy (all types) | 4 | dr_recommend_hyst_type___4 | Laparoscopic Assisted Vaginal Hysterectomy (peritoneal keyhole and vaginal) | 5 | dr_recommend_hyst_type___5 | Robotic Hysterectomy (using robotic surgical arm) |
| 1  | dr_recommend_hyst_type___1                                                                    | Open Abdominal Hysterectomy (laparotomy)                                                                |                                                                                                                                                                                                                                                                                                                                                                                                                                                                                                                                                                                                                                                                                                  |   |                            |                                          |    |                            |                                  |   |                            |                                             |   |                            |                                                                             |   |                            |                                                   |
| 2  | dr_recommend_hyst_type___2                                                                    | Vaginal Hysterectomy (all types)                                                                        |                                                                                                                                                                                                                                                                                                                                                                                                                                                                                                                                                                                                                                                                                                  |   |                            |                                          |    |                            |                                  |   |                            |                                             |   |                            |                                                                             |   |                            |                                                   |
| 3  | dr_recommend_hyst_type___3                                                                    | Total Laparoscopic Hysterectomy (all types)                                                             |                                                                                                                                                                                                                                                                                                                                                                                                                                                                                                                                                                                                                                                                                                  |   |                            |                                          |    |                            |                                  |   |                            |                                             |   |                            |                                                                             |   |                            |                                                   |
| 4  | dr_recommend_hyst_type___4                                                                    | Laparoscopic Assisted Vaginal Hysterectomy (peritoneal keyhole and vaginal)                             |                                                                                                                                                                                                                                                                                                                                                                                                                                                                                                                                                                                                                                                                                                  |   |                            |                                          |    |                            |                                  |   |                            |                                             |   |                            |                                                                             |   |                            |                                                   |
| 5  | dr_recommend_hyst_type___5                                                                    | Robotic Hysterectomy (using robotic surgical arm)                                                       |                                                                                                                                                                                                                                                                                                                                                                                                                                                                                                                                                                                                                                                                                                  |   |                            |                                          |    |                            |                                  |   |                            |                                             |   |                            |                                                                             |   |                            |                                                   |
| 65 | second_opinion                                                                                | Did you get a second opinion about your hysterectomy?                                                   | <p>yesno</p> <table border="1"> <tr> <td>1</td><td>Yes</td></tr> <tr> <td>0</td><td>No</td></tr> </table> <p>Custom alignment: LV</p> <p>Question number: 38</p>                                                                                                                                                                                                                                                                                                                                                                                                                                                                                                                                 | 1 | Yes                        | 0                                        | No |                            |                                  |   |                            |                                             |   |                            |                                                                             |   |                            |                                                   |
| 1  | Yes                                                                                           |                                                                                                         |                                                                                                                                                                                                                                                                                                                                                                                                                                                                                                                                                                                                                                                                                                  |   |                            |                                          |    |                            |                                  |   |                            |                                             |   |                            |                                                                             |   |                            |                                                   |
| 0  | No                                                                                            |                                                                                                         |                                                                                                                                                                                                                                                                                                                                                                                                                                                                                                                                                                                                                                                                                                  |   |                            |                                          |    |                            |                                  |   |                            |                                             |   |                            |                                                                             |   |                            |                                                   |
| 66 | second_opinion_options                                                                        | <p>What type/s of hysterectomy did the second doctor recommend?</p> <p><i>select all that apply</i></p> | <p>checkbox, Required</p> <table border="1"> <tr> <td>1</td><td>second_opinion_options___1</td><td>Open Abdominal</td></tr> </table>                                                                                                                                                                                                                                                                                                                                                                                                                                                                                                                                                             | 1 | second_opinion_options___1 | Open Abdominal                           |    |                            |                                  |   |                            |                                             |   |                            |                                                                             |   |                            |                                                   |
| 1  | second_opinion_options___1                                                                    | Open Abdominal                                                                                          |                                                                                                                                                                                                                                                                                                                                                                                                                                                                                                                                                                                                                                                                                                  |   |                            |                                          |    |                            |                                  |   |                            |                                             |   |                            |                                                                             |   |                            |                                                   |

|    |                                                   |                            |                                              |                           |                                                                                  |
|----|---------------------------------------------------|----------------------------|----------------------------------------------|---------------------------|----------------------------------------------------------------------------------|
|    | Show the field ONLY if:<br>[second_opinion] = '1' |                            |                                              |                           | Hyste<br>(long<br>horiz<br>vertic<br>abdomi                                      |
|    |                                                   |                            | 2                                            | second_opinion_options__2 | Vagin<br>Hyste<br>(all pe<br>throug<br>vagin                                     |
|    |                                                   |                            | 3                                            | second_opinion_options__3 | Total<br>Lapar<br>Hyste<br>(all pe<br>throug<br>keyho<br>abdomi                  |
|    |                                                   |                            | 4                                            | second_opinion_options__4 | Lapar<br>Assis<br>Hyste<br>(perf<br>throug<br>keyho<br>the al<br>and tl<br>vagin |
|    |                                                   |                            | 5                                            | second_opinion_options__5 | Robo<br>Hyste<br>(using<br>attach<br>roboti<br>surge<br>arm v<br>comp            |
|    |                                                   |                            | Custom alignment: LV<br>Question number: 38a |                           |                                                                                  |
| 67 | decision_surg_risks                               | Surgical risks             | radio (Matrix), Required                     |                           |                                                                                  |
|    |                                                   |                            | 1                                            | Very much                 |                                                                                  |
|    |                                                   |                            | 2                                            | Somewhat                  |                                                                                  |
|    |                                                   |                            | 3                                            | A little bit              |                                                                                  |
|    |                                                   |                            | 4                                            | Not at all                |                                                                                  |
|    |                                                   |                            | 5                                            | Don't recall              |                                                                                  |
|    |                                                   |                            | Question number: 39                          |                           |                                                                                  |
| 68 | decision_sex_fx                                   | Sexual function            | radio (Matrix), Required                     |                           |                                                                                  |
|    |                                                   |                            | 1                                            | Very much                 |                                                                                  |
|    |                                                   |                            | 2                                            | Somewhat                  |                                                                                  |
|    |                                                   |                            | 3                                            | A little bit              |                                                                                  |
|    |                                                   |                            | 4                                            | Not at all                |                                                                                  |
|    |                                                   |                            | 5                                            | Don't recall              |                                                                                  |
|    |                                                   |                            | Question number: 40                          |                           |                                                                                  |
| 69 | decision_body_image                               | Body image (e.g. scarring) | radio (Matrix), Required                     |                           |                                                                                  |
|    |                                                   |                            | 1                                            | Very much                 |                                                                                  |
|    |                                                   |                            | 2                                            | Somewhat                  |                                                                                  |
|    |                                                   |                            | 3                                            | A little bit              |                                                                                  |
|    |                                                   |                            | 4                                            | Not at all                |                                                                                  |

|    |                                                                                                               |                                                              |                                                                                                                                                                                                                                                                                                 |   |              |   |          |   |              |   |            |   |              |
|----|---------------------------------------------------------------------------------------------------------------|--------------------------------------------------------------|-------------------------------------------------------------------------------------------------------------------------------------------------------------------------------------------------------------------------------------------------------------------------------------------------|---|--------------|---|----------|---|--------------|---|------------|---|--------------|
|    |                                                                                                               |                                                              | <table border="1"> <tr> <td>5</td><td>Don't recall</td></tr> </table> <p>Question number: 41</p>                                                                                                                                                                                                | 5 | Don't recall |   |          |   |              |   |            |   |              |
| 5  | Don't recall                                                                                                  |                                                              |                                                                                                                                                                                                                                                                                                 |   |              |   |          |   |              |   |            |   |              |
| 70 | decision_cost                                                                                                 | Cost                                                         | <p>radio (Matrix), Required</p> <table border="1"> <tr> <td>1</td><td>Very much</td></tr> <tr> <td>2</td><td>Somewhat</td></tr> <tr> <td>3</td><td>A little bit</td></tr> <tr> <td>4</td><td>Not at all</td></tr> <tr> <td>5</td><td>Don't recall</td></tr> </table> <p>Question number: 42</p> | 1 | Very much    | 2 | Somewhat | 3 | A little bit | 4 | Not at all | 5 | Don't recall |
| 1  | Very much                                                                                                     |                                                              |                                                                                                                                                                                                                                                                                                 |   |              |   |          |   |              |   |            |   |              |
| 2  | Somewhat                                                                                                      |                                                              |                                                                                                                                                                                                                                                                                                 |   |              |   |          |   |              |   |            |   |              |
| 3  | A little bit                                                                                                  |                                                              |                                                                                                                                                                                                                                                                                                 |   |              |   |          |   |              |   |            |   |              |
| 4  | Not at all                                                                                                    |                                                              |                                                                                                                                                                                                                                                                                                 |   |              |   |          |   |              |   |            |   |              |
| 5  | Don't recall                                                                                                  |                                                              |                                                                                                                                                                                                                                                                                                 |   |              |   |          |   |              |   |            |   |              |
| 71 | decision_recovery                                                                                             | Recovery time                                                | <p>radio (Matrix), Required</p> <table border="1"> <tr> <td>1</td><td>Very much</td></tr> <tr> <td>2</td><td>Somewhat</td></tr> <tr> <td>3</td><td>A little bit</td></tr> <tr> <td>4</td><td>Not at all</td></tr> <tr> <td>5</td><td>Don't recall</td></tr> </table> <p>Question number: 43</p> | 1 | Very much    | 2 | Somewhat | 3 | A little bit | 4 | Not at all | 5 | Don't recall |
| 1  | Very much                                                                                                     |                                                              |                                                                                                                                                                                                                                                                                                 |   |              |   |          |   |              |   |            |   |              |
| 2  | Somewhat                                                                                                      |                                                              |                                                                                                                                                                                                                                                                                                 |   |              |   |          |   |              |   |            |   |              |
| 3  | A little bit                                                                                                  |                                                              |                                                                                                                                                                                                                                                                                                 |   |              |   |          |   |              |   |            |   |              |
| 4  | Not at all                                                                                                    |                                                              |                                                                                                                                                                                                                                                                                                 |   |              |   |          |   |              |   |            |   |              |
| 5  | Don't recall                                                                                                  |                                                              |                                                                                                                                                                                                                                                                                                 |   |              |   |          |   |              |   |            |   |              |
| 72 | decision_support                                                                                              | Family or main support person's preference                   | <p>radio (Matrix), Required</p> <table border="1"> <tr> <td>1</td><td>Very much</td></tr> <tr> <td>2</td><td>Somewhat</td></tr> <tr> <td>3</td><td>A little bit</td></tr> <tr> <td>4</td><td>Not at all</td></tr> <tr> <td>5</td><td>Don't recall</td></tr> </table> <p>Question number: 44</p> | 1 | Very much    | 2 | Somewhat | 3 | A little bit | 4 | Not at all | 5 | Don't recall |
| 1  | Very much                                                                                                     |                                                              |                                                                                                                                                                                                                                                                                                 |   |              |   |          |   |              |   |            |   |              |
| 2  | Somewhat                                                                                                      |                                                              |                                                                                                                                                                                                                                                                                                 |   |              |   |          |   |              |   |            |   |              |
| 3  | A little bit                                                                                                  |                                                              |                                                                                                                                                                                                                                                                                                 |   |              |   |          |   |              |   |            |   |              |
| 4  | Not at all                                                                                                    |                                                              |                                                                                                                                                                                                                                                                                                 |   |              |   |          |   |              |   |            |   |              |
| 5  | Don't recall                                                                                                  |                                                              |                                                                                                                                                                                                                                                                                                 |   |              |   |          |   |              |   |            |   |              |
| 73 | decision_surgeon                                                                                              | Surgeon's preference                                         | <p>radio (Matrix), Required</p> <table border="1"> <tr> <td>1</td><td>Very much</td></tr> <tr> <td>2</td><td>Somewhat</td></tr> <tr> <td>3</td><td>A little bit</td></tr> <tr> <td>4</td><td>Not at all</td></tr> <tr> <td>5</td><td>Don't recall</td></tr> </table> <p>Question number: 45</p> | 1 | Very much    | 2 | Somewhat | 3 | A little bit | 4 | Not at all | 5 | Don't recall |
| 1  | Very much                                                                                                     |                                                              |                                                                                                                                                                                                                                                                                                 |   |              |   |          |   |              |   |            |   |              |
| 2  | Somewhat                                                                                                      |                                                              |                                                                                                                                                                                                                                                                                                 |   |              |   |          |   |              |   |            |   |              |
| 3  | A little bit                                                                                                  |                                                              |                                                                                                                                                                                                                                                                                                 |   |              |   |          |   |              |   |            |   |              |
| 4  | Not at all                                                                                                    |                                                              |                                                                                                                                                                                                                                                                                                 |   |              |   |          |   |              |   |            |   |              |
| 5  | Don't recall                                                                                                  |                                                              |                                                                                                                                                                                                                                                                                                 |   |              |   |          |   |              |   |            |   |              |
| 74 | decision_other                                                                                                | Other (please specify other reason if any)                   | <p>radio (Matrix)</p> <table border="1"> <tr> <td>1</td><td>Very much</td></tr> <tr> <td>2</td><td>Somewhat</td></tr> <tr> <td>3</td><td>A little bit</td></tr> <tr> <td>4</td><td>Not at all</td></tr> <tr> <td>5</td><td>Don't recall</td></tr> </table> <p>Question number: 46</p>           | 1 | Very much    | 2 | Somewhat | 3 | A little bit | 4 | Not at all | 5 | Don't recall |
| 1  | Very much                                                                                                     |                                                              |                                                                                                                                                                                                                                                                                                 |   |              |   |          |   |              |   |            |   |              |
| 2  | Somewhat                                                                                                      |                                                              |                                                                                                                                                                                                                                                                                                 |   |              |   |          |   |              |   |            |   |              |
| 3  | A little bit                                                                                                  |                                                              |                                                                                                                                                                                                                                                                                                 |   |              |   |          |   |              |   |            |   |              |
| 4  | Not at all                                                                                                    |                                                              |                                                                                                                                                                                                                                                                                                 |   |              |   |          |   |              |   |            |   |              |
| 5  | Don't recall                                                                                                  |                                                              |                                                                                                                                                                                                                                                                                                 |   |              |   |          |   |              |   |            |   |              |
| 75 | specify_other_hyst_decision<br><br>Show the field ONLY if:<br>[decision_other] = '1'<br>or [decision_other] = | Please specify other reason/s for your hysterectomy decision | <p>text, Required</p> <p>Custom alignment: LV</p> <p>Question number: 46a</p>                                                                                                                                                                                                                   |   |              |   |          |   |              |   |            |   |              |

|    |                                                                                                                        |                                                                                                                                          |                                                                                                                                                                                                                                                                                                                                                                                                                                                                                                                                                                                                                                                                                                                    |   |                                                                                      |   |                                                                  |   |                                                                                      |   |                                                                                                                        |   |                                                                                                        |
|----|------------------------------------------------------------------------------------------------------------------------|------------------------------------------------------------------------------------------------------------------------------------------|--------------------------------------------------------------------------------------------------------------------------------------------------------------------------------------------------------------------------------------------------------------------------------------------------------------------------------------------------------------------------------------------------------------------------------------------------------------------------------------------------------------------------------------------------------------------------------------------------------------------------------------------------------------------------------------------------------------------|---|--------------------------------------------------------------------------------------|---|------------------------------------------------------------------|---|--------------------------------------------------------------------------------------|---|------------------------------------------------------------------------------------------------------------------------|---|--------------------------------------------------------------------------------------------------------|
|    | '2' or [decision_other] = '3'                                                                                          |                                                                                                                                          |                                                                                                                                                                                                                                                                                                                                                                                                                                                                                                                                                                                                                                                                                                                    |   |                                                                                      |   |                                                                  |   |                                                                                      |   |                                                                                                                        |   |                                                                                                        |
| 76 | type_hyst_had                                                                                                          | Which type of hysterectomy did you have?                                                                                                 | <div>radio, Required</div> <table><tr><td>1</td><td>Open Abdominal Hysterectomy (long cut, either horizontal or vertical across abdomen)</td></tr><tr><td>2</td><td>Vaginal Hysterectomy (all performed through the vagina, no cuts)</td></tr><tr><td>3</td><td>Total Laparoscopic Hysterectomy (all performed through tiny keyhole cuts on abdomen)</td></tr><tr><td>4</td><td>Laparoscopically Assisted Vaginal Hysterectomy (performed through tiny keyhole cuts on the abdomen and through vagina)</td></tr><tr><td>5</td><td>Robotic Hysterectomy (using tools attached to a robotic arm, the surgeon controls arm with a computer)</td></tr></table> <div>Custom alignment: LV<br/>Question number: 47</div> | 1 | Open Abdominal Hysterectomy (long cut, either horizontal or vertical across abdomen) | 2 | Vaginal Hysterectomy (all performed through the vagina, no cuts) | 3 | Total Laparoscopic Hysterectomy (all performed through tiny keyhole cuts on abdomen) | 4 | Laparoscopically Assisted Vaginal Hysterectomy (performed through tiny keyhole cuts on the abdomen and through vagina) | 5 | Robotic Hysterectomy (using tools attached to a robotic arm, the surgeon controls arm with a computer) |
| 1  | Open Abdominal Hysterectomy (long cut, either horizontal or vertical across abdomen)                                   |                                                                                                                                          |                                                                                                                                                                                                                                                                                                                                                                                                                                                                                                                                                                                                                                                                                                                    |   |                                                                                      |   |                                                                  |   |                                                                                      |   |                                                                                                                        |   |                                                                                                        |
| 2  | Vaginal Hysterectomy (all performed through the vagina, no cuts)                                                       |                                                                                                                                          |                                                                                                                                                                                                                                                                                                                                                                                                                                                                                                                                                                                                                                                                                                                    |   |                                                                                      |   |                                                                  |   |                                                                                      |   |                                                                                                                        |   |                                                                                                        |
| 3  | Total Laparoscopic Hysterectomy (all performed through tiny keyhole cuts on abdomen)                                   |                                                                                                                                          |                                                                                                                                                                                                                                                                                                                                                                                                                                                                                                                                                                                                                                                                                                                    |   |                                                                                      |   |                                                                  |   |                                                                                      |   |                                                                                                                        |   |                                                                                                        |
| 4  | Laparoscopically Assisted Vaginal Hysterectomy (performed through tiny keyhole cuts on the abdomen and through vagina) |                                                                                                                                          |                                                                                                                                                                                                                                                                                                                                                                                                                                                                                                                                                                                                                                                                                                                    |   |                                                                                      |   |                                                                  |   |                                                                                      |   |                                                                                                                        |   |                                                                                                        |
| 5  | Robotic Hysterectomy (using tools attached to a robotic arm, the surgeon controls arm with a computer)                 |                                                                                                                                          |                                                                                                                                                                                                                                                                                                                                                                                                                                                                                                                                                                                                                                                                                                                    |   |                                                                                      |   |                                                                  |   |                                                                                      |   |                                                                                                                        |   |                                                                                                        |
| 77 | hospital_nights                                                                                                        | How many nights were you in hospital after your hysterectomy?                                                                            | <div>text, Required</div> <div>Custom alignment: LV</div> <div>Question number: 48</div>                                                                                                                                                                                                                                                                                                                                                                                                                                                                                                                                                                                                                           |   |                                                                                      |   |                                                                  |   |                                                                                      |   |                                                                                                                        |   |                                                                                                        |
| 78 | problems_as_inpt                                                                                                       | Did any problems occur, whilst you were in hospital for your hysterectomy, before you were discharged home?                              | <div>yesno, Required</div> <table><tr><td>1</td><td>Yes</td></tr><tr><td>0</td><td>No</td></tr></table> <div>Custom alignment: LV</div> <div>Question number: 49</div>                                                                                                                                                                                                                                                                                                                                                                                                                                                                                                                                             | 1 | Yes                                                                                  | 0 | No                                                               |   |                                                                                      |   |                                                                                                                        |   |                                                                                                        |
| 1  | Yes                                                                                                                    |                                                                                                                                          |                                                                                                                                                                                                                                                                                                                                                                                                                                                                                                                                                                                                                                                                                                                    |   |                                                                                      |   |                                                                  |   |                                                                                      |   |                                                                                                                        |   |                                                                                                        |
| 0  | No                                                                                                                     |                                                                                                                                          |                                                                                                                                                                                                                                                                                                                                                                                                                                                                                                                                                                                                                                                                                                                    |   |                                                                                      |   |                                                                  |   |                                                                                      |   |                                                                                                                        |   |                                                                                                        |
| 79 | what_problems_inpt<br><div>Show the field ONLY if:<br/>[problems_as_inpt] = '1'</div>                                  | What problems occurred whilst you were in hospital recovering from your hysterectomy?                                                    | <div>notes, Required</div> <div>Custom alignment: LV</div> <div>Question number: 49a</div>                                                                                                                                                                                                                                                                                                                                                                                                                                                                                                                                                                                                                         |   |                                                                                      |   |                                                                  |   |                                                                                      |   |                                                                                                                        |   |                                                                                                        |
| 80 | return_to_ot_when_inpt<br><div>Show the field ONLY if:<br/>[problems_as_inpt] = '1'</div>                              | Did you need to go back to the operating theatre for these problems whilst you were still in hospital recovering from your hysterectomy? | <div>yesno, Required</div> <table><tr><td>1</td><td>Yes</td></tr><tr><td>0</td><td>No</td></tr></table> <div>Custom alignment: LV</div> <div>Question number: 49b</div>                                                                                                                                                                                                                                                                                                                                                                                                                                                                                                                                            | 1 | Yes                                                                                  | 0 | No                                                               |   |                                                                                      |   |                                                                                                                        |   |                                                                                                        |
| 1  | Yes                                                                                                                    |                                                                                                                                          |                                                                                                                                                                                                                                                                                                                                                                                                                                                                                                                                                                                                                                                                                                                    |   |                                                                                      |   |                                                                  |   |                                                                                      |   |                                                                                                                        |   |                                                                                                        |
| 0  | No                                                                                                                     |                                                                                                                                          |                                                                                                                                                                                                                                                                                                                                                                                                                                                                                                                                                                                                                                                                                                                    |   |                                                                                      |   |                                                                  |   |                                                                                      |   |                                                                                                                        |   |                                                                                                        |
| 81 | good_dc_info                                                                                                           | When you left the hospital (discharged), were you well prepared and given enough information to recover at home?                         | <div>yesno, Required</div> <table><tr><td>1</td><td>Yes</td></tr><tr><td>0</td><td>No</td></tr></table> <div>Custom alignment: LV</div> <div>Question number: 50</div>                                                                                                                                                                                                                                                                                                                                                                                                                                                                                                                                             | 1 | Yes                                                                                  | 0 | No                                                               |   |                                                                                      |   |                                                                                                                        |   |                                                                                                        |
| 1  | Yes                                                                                                                    |                                                                                                                                          |                                                                                                                                                                                                                                                                                                                                                                                                                                                                                                                                                                                                                                                                                                                    |   |                                                                                      |   |                                                                  |   |                                                                                      |   |                                                                                                                        |   |                                                                                                        |
| 0  | No                                                                                                                     |                                                                                                                                          |                                                                                                                                                                                                                                                                                                                                                                                                                                                                                                                                                                                                                                                                                                                    |   |                                                                                      |   |                                                                  |   |                                                                                      |   |                                                                                                                        |   |                                                                                                        |
| 82 | missing_info_on_dc<br><div>Show the field ONLY if:<br/>[good_dc_info] = '0'</div>                                      | What information do you think was missing that could have helped you more at home?                                                       | <div>notes, Required</div> <div>Custom alignment: LV</div> <div>Question number: 50a</div>                                                                                                                                                                                                                                                                                                                                                                                                                                                                                                                                                                                                                         |   |                                                                                      |   |                                                                  |   |                                                                                      |   |                                                                                                                        |   |                                                                                                        |
| 83 | unprepared_on_dc                                                                                                       | What did you find you were unprepared for after discharge from the hospital?                                                             | <div>notes, Required</div> <div>Custom alignment: LV</div> <div>Question number: 50b</div>                                                                                                                                                                                                                                                                                                                                                                                                                                                                                                                                                                                                                         |   |                                                                                      |   |                                                                  |   |                                                                                      |   |                                                                                                                        |   |                                                                                                        |

|    |                                                                                 |                                                                                                          |                                                                                                                                                                                                                                                                                                                                                                                                                   |   |               |   |                |   |                 |   |                 |   |                  |   |              |   |              |   |                |
|----|---------------------------------------------------------------------------------|----------------------------------------------------------------------------------------------------------|-------------------------------------------------------------------------------------------------------------------------------------------------------------------------------------------------------------------------------------------------------------------------------------------------------------------------------------------------------------------------------------------------------------------|---|---------------|---|----------------|---|-----------------|---|-----------------|---|------------------|---|--------------|---|--------------|---|----------------|
|    | Show the field ONLY if:<br>[good_dc_info] = '0'                                 |                                                                                                          |                                                                                                                                                                                                                                                                                                                                                                                                                   |   |               |   |                |   |                 |   |                 |   |                  |   |              |   |              |   |                |
| 84 | return_to_hospital<br><br>Show the field ONLY if:<br>[return_to_hospital] = '1' | After you were discharged from the hospital, did you have to return to the hospital for any problems?    | yesno, Required<br><table><tr><td>1</td><td>Yes</td></tr><tr><td>0</td><td>No</td></tr></table><br>Custom alignment: LV<br>Question number: 51                                                                                                                                                                                                                                                                    | 1 | Yes           | 0 | No             |   |                 |   |                 |   |                  |   |              |   |              |   |                |
| 1  | Yes                                                                             |                                                                                                          |                                                                                                                                                                                                                                                                                                                                                                                                                   |   |               |   |                |   |                 |   |                 |   |                  |   |              |   |              |   |                |
| 0  | No                                                                              |                                                                                                          |                                                                                                                                                                                                                                                                                                                                                                                                                   |   |               |   |                |   |                 |   |                 |   |                  |   |              |   |              |   |                |
| 85 | why_return_to_hosp<br><br>Show the field ONLY if:<br>[return_to_hospital] = '1' | What were the problems that caused you to have to return to the hospital after you were discharged home? | notes, Required<br>Custom alignment: LV<br>Question number: 51a                                                                                                                                                                                                                                                                                                                                                   |   |               |   |                |   |                 |   |                 |   |                  |   |              |   |              |   |                |
| 86 | taken_back_to_ot<br><br>Show the field ONLY if:<br>[return_to_hospital] = '1'   | Were you taken back to the operating theatre after returning to the hospital with these problems?        | yesno, Required<br><table><tr><td>1</td><td>Yes</td></tr><tr><td>0</td><td>No</td></tr></table><br>Custom alignment: LV<br>Question number: 51b                                                                                                                                                                                                                                                                   | 1 | Yes           | 0 | No             |   |                 |   |                 |   |                  |   |              |   |              |   |                |
| 1  | Yes                                                                             |                                                                                                          |                                                                                                                                                                                                                                                                                                                                                                                                                   |   |               |   |                |   |                 |   |                 |   |                  |   |              |   |              |   |                |
| 0  | No                                                                              |                                                                                                          |                                                                                                                                                                                                                                                                                                                                                                                                                   |   |               |   |                |   |                 |   |                 |   |                  |   |              |   |              |   |                |
| 87 | bend_stretch                                                                    | I could bend and stretch                                                                                 | radio (Matrix), Required<br><table><tr><td>1</td><td>Within 1 week</td></tr><tr><td>2</td><td>Within 6 weeks</td></tr><tr><td>3</td><td>Within 3 months</td></tr><tr><td>4</td><td>Within 6 months</td></tr><tr><td>5</td><td>Within 12 months</td></tr><tr><td>6</td><td>Not resolved</td></tr><tr><td>7</td><td>Don't recall</td></tr><tr><td>8</td><td>Not applicable</td></tr></table><br>Question number: 52 | 1 | Within 1 week | 2 | Within 6 weeks | 3 | Within 3 months | 4 | Within 6 months | 5 | Within 12 months | 6 | Not resolved | 7 | Don't recall | 8 | Not applicable |
| 1  | Within 1 week                                                                   |                                                                                                          |                                                                                                                                                                                                                                                                                                                                                                                                                   |   |               |   |                |   |                 |   |                 |   |                  |   |              |   |              |   |                |
| 2  | Within 6 weeks                                                                  |                                                                                                          |                                                                                                                                                                                                                                                                                                                                                                                                                   |   |               |   |                |   |                 |   |                 |   |                  |   |              |   |              |   |                |
| 3  | Within 3 months                                                                 |                                                                                                          |                                                                                                                                                                                                                                                                                                                                                                                                                   |   |               |   |                |   |                 |   |                 |   |                  |   |              |   |              |   |                |
| 4  | Within 6 months                                                                 |                                                                                                          |                                                                                                                                                                                                                                                                                                                                                                                                                   |   |               |   |                |   |                 |   |                 |   |                  |   |              |   |              |   |                |
| 5  | Within 12 months                                                                |                                                                                                          |                                                                                                                                                                                                                                                                                                                                                                                                                   |   |               |   |                |   |                 |   |                 |   |                  |   |              |   |              |   |                |
| 6  | Not resolved                                                                    |                                                                                                          |                                                                                                                                                                                                                                                                                                                                                                                                                   |   |               |   |                |   |                 |   |                 |   |                  |   |              |   |              |   |                |
| 7  | Don't recall                                                                    |                                                                                                          |                                                                                                                                                                                                                                                                                                                                                                                                                   |   |               |   |                |   |                 |   |                 |   |                  |   |              |   |              |   |                |
| 8  | Not applicable                                                                  |                                                                                                          |                                                                                                                                                                                                                                                                                                                                                                                                                   |   |               |   |                |   |                 |   |                 |   |                  |   |              |   |              |   |                |
| 88 | usual_activities                                                                | I returned to my usual activities                                                                        | radio (Matrix), Required<br><table><tr><td>1</td><td>Within 1 week</td></tr><tr><td>2</td><td>Within 6 weeks</td></tr><tr><td>3</td><td>Within 3 months</td></tr><tr><td>4</td><td>Within 6 months</td></tr><tr><td>5</td><td>Within 12 months</td></tr><tr><td>6</td><td>Not resolved</td></tr><tr><td>7</td><td>Don't recall</td></tr><tr><td>8</td><td>Not applicable</td></tr></table><br>Question number: 53 | 1 | Within 1 week | 2 | Within 6 weeks | 3 | Within 3 months | 4 | Within 6 months | 5 | Within 12 months | 6 | Not resolved | 7 | Don't recall | 8 | Not applicable |
| 1  | Within 1 week                                                                   |                                                                                                          |                                                                                                                                                                                                                                                                                                                                                                                                                   |   |               |   |                |   |                 |   |                 |   |                  |   |              |   |              |   |                |
| 2  | Within 6 weeks                                                                  |                                                                                                          |                                                                                                                                                                                                                                                                                                                                                                                                                   |   |               |   |                |   |                 |   |                 |   |                  |   |              |   |              |   |                |
| 3  | Within 3 months                                                                 |                                                                                                          |                                                                                                                                                                                                                                                                                                                                                                                                                   |   |               |   |                |   |                 |   |                 |   |                  |   |              |   |              |   |                |
| 4  | Within 6 months                                                                 |                                                                                                          |                                                                                                                                                                                                                                                                                                                                                                                                                   |   |               |   |                |   |                 |   |                 |   |                  |   |              |   |              |   |                |
| 5  | Within 12 months                                                                |                                                                                                          |                                                                                                                                                                                                                                                                                                                                                                                                                   |   |               |   |                |   |                 |   |                 |   |                  |   |              |   |              |   |                |
| 6  | Not resolved                                                                    |                                                                                                          |                                                                                                                                                                                                                                                                                                                                                                                                                   |   |               |   |                |   |                 |   |                 |   |                  |   |              |   |              |   |                |
| 7  | Don't recall                                                                    |                                                                                                          |                                                                                                                                                                                                                                                                                                                                                                                                                   |   |               |   |                |   |                 |   |                 |   |                  |   |              |   |              |   |                |
| 8  | Not applicable                                                                  |                                                                                                          |                                                                                                                                                                                                                                                                                                                                                                                                                   |   |               |   |                |   |                 |   |                 |   |                  |   |              |   |              |   |                |
| 89 | returned_work                                                                   | I returned to work                                                                                       | radio (Matrix), Required<br><table><tr><td>1</td><td>Within 1 week</td></tr><tr><td>2</td><td>Within 6 weeks</td></tr><tr><td>3</td><td>Within 3 months</td></tr><tr><td>4</td><td>Within 6 months</td></tr><tr><td>5</td><td>Within 12 months</td></tr><tr><td>6</td><td>Not resolved</td></tr></table>                                                                                                          | 1 | Within 1 week | 2 | Within 6 weeks | 3 | Within 3 months | 4 | Within 6 months | 5 | Within 12 months | 6 | Not resolved |   |              |   |                |
| 1  | Within 1 week                                                                   |                                                                                                          |                                                                                                                                                                                                                                                                                                                                                                                                                   |   |               |   |                |   |                 |   |                 |   |                  |   |              |   |              |   |                |
| 2  | Within 6 weeks                                                                  |                                                                                                          |                                                                                                                                                                                                                                                                                                                                                                                                                   |   |               |   |                |   |                 |   |                 |   |                  |   |              |   |              |   |                |
| 3  | Within 3 months                                                                 |                                                                                                          |                                                                                                                                                                                                                                                                                                                                                                                                                   |   |               |   |                |   |                 |   |                 |   |                  |   |              |   |              |   |                |
| 4  | Within 6 months                                                                 |                                                                                                          |                                                                                                                                                                                                                                                                                                                                                                                                                   |   |               |   |                |   |                 |   |                 |   |                  |   |              |   |              |   |                |
| 5  | Within 12 months                                                                |                                                                                                          |                                                                                                                                                                                                                                                                                                                                                                                                                   |   |               |   |                |   |                 |   |                 |   |                  |   |              |   |              |   |                |
| 6  | Not resolved                                                                    |                                                                                                          |                                                                                                                                                                                                                                                                                                                                                                                                                   |   |               |   |                |   |                 |   |                 |   |                  |   |              |   |              |   |                |



|    |                  |                                      |                                                                                                                                                                                                                                                                                                                                                                                                                                               |   |               |   |                |   |                 |   |                 |   |                  |   |              |   |              |   |                |
|----|------------------|--------------------------------------|-----------------------------------------------------------------------------------------------------------------------------------------------------------------------------------------------------------------------------------------------------------------------------------------------------------------------------------------------------------------------------------------------------------------------------------------------|---|---------------|---|----------------|---|-----------------|---|-----------------|---|------------------|---|--------------|---|--------------|---|----------------|
|    |                  |                                      | <table border="1"> <tr> <td>7</td><td>Don't recall</td></tr> <tr> <td>8</td><td>Not applicable</td></tr> </table> <p>Question number: 54</p>                                                                                                                                                                                                                                                                                                  | 7 | Don't recall  | 8 | Not applicable |   |                 |   |                 |   |                  |   |              |   |              |   |                |
| 7  | Don't recall     |                                      |                                                                                                                                                                                                                                                                                                                                                                                                                                               |   |               |   |                |   |                 |   |                 |   |                  |   |              |   |              |   |                |
| 8  | Not applicable   |                                      |                                                                                                                                                                                                                                                                                                                                                                                                                                               |   |               |   |                |   |                 |   |                 |   |                  |   |              |   |              |   |                |
| 90 | no_pain          | I no longer had any pain             | <p>radio (Matrix), Required</p> <table border="1"> <tr><td>1</td><td>Within 1 week</td></tr> <tr><td>2</td><td>Within 6 weeks</td></tr> <tr><td>3</td><td>Within 3 months</td></tr> <tr><td>4</td><td>Within 6 months</td></tr> <tr><td>5</td><td>Within 12 months</td></tr> <tr><td>6</td><td>Not resolved</td></tr> <tr><td>7</td><td>Don't recall</td></tr> <tr><td>8</td><td>Not applicable</td></tr> </table> <p>Question number: 55</p> | 1 | Within 1 week | 2 | Within 6 weeks | 3 | Within 3 months | 4 | Within 6 months | 5 | Within 12 months | 6 | Not resolved | 7 | Don't recall | 8 | Not applicable |
| 1  | Within 1 week    |                                      |                                                                                                                                                                                                                                                                                                                                                                                                                                               |   |               |   |                |   |                 |   |                 |   |                  |   |              |   |              |   |                |
| 2  | Within 6 weeks   |                                      |                                                                                                                                                                                                                                                                                                                                                                                                                                               |   |               |   |                |   |                 |   |                 |   |                  |   |              |   |              |   |                |
| 3  | Within 3 months  |                                      |                                                                                                                                                                                                                                                                                                                                                                                                                                               |   |               |   |                |   |                 |   |                 |   |                  |   |              |   |              |   |                |
| 4  | Within 6 months  |                                      |                                                                                                                                                                                                                                                                                                                                                                                                                                               |   |               |   |                |   |                 |   |                 |   |                  |   |              |   |              |   |                |
| 5  | Within 12 months |                                      |                                                                                                                                                                                                                                                                                                                                                                                                                                               |   |               |   |                |   |                 |   |                 |   |                  |   |              |   |              |   |                |
| 6  | Not resolved     |                                      |                                                                                                                                                                                                                                                                                                                                                                                                                                               |   |               |   |                |   |                 |   |                 |   |                  |   |              |   |              |   |                |
| 7  | Don't recall     |                                      |                                                                                                                                                                                                                                                                                                                                                                                                                                               |   |               |   |                |   |                 |   |                 |   |                  |   |              |   |              |   |                |
| 8  | Not applicable   |                                      |                                                                                                                                                                                                                                                                                                                                                                                                                                               |   |               |   |                |   |                 |   |                 |   |                  |   |              |   |              |   |                |
| 91 | bowels_normal    | My bowels worked normally            | <p>radio (Matrix), Required</p> <table border="1"> <tr><td>1</td><td>Within 1 week</td></tr> <tr><td>2</td><td>Within 6 weeks</td></tr> <tr><td>3</td><td>Within 3 months</td></tr> <tr><td>4</td><td>Within 6 months</td></tr> <tr><td>5</td><td>Within 12 months</td></tr> <tr><td>6</td><td>Not resolved</td></tr> <tr><td>7</td><td>Don't recall</td></tr> <tr><td>8</td><td>Not applicable</td></tr> </table> <p>Question number: 56</p> | 1 | Within 1 week | 2 | Within 6 weeks | 3 | Within 3 months | 4 | Within 6 months | 5 | Within 12 months | 6 | Not resolved | 7 | Don't recall | 8 | Not applicable |
| 1  | Within 1 week    |                                      |                                                                                                                                                                                                                                                                                                                                                                                                                                               |   |               |   |                |   |                 |   |                 |   |                  |   |              |   |              |   |                |
| 2  | Within 6 weeks   |                                      |                                                                                                                                                                                                                                                                                                                                                                                                                                               |   |               |   |                |   |                 |   |                 |   |                  |   |              |   |              |   |                |
| 3  | Within 3 months  |                                      |                                                                                                                                                                                                                                                                                                                                                                                                                                               |   |               |   |                |   |                 |   |                 |   |                  |   |              |   |              |   |                |
| 4  | Within 6 months  |                                      |                                                                                                                                                                                                                                                                                                                                                                                                                                               |   |               |   |                |   |                 |   |                 |   |                  |   |              |   |              |   |                |
| 5  | Within 12 months |                                      |                                                                                                                                                                                                                                                                                                                                                                                                                                               |   |               |   |                |   |                 |   |                 |   |                  |   |              |   |              |   |                |
| 6  | Not resolved     |                                      |                                                                                                                                                                                                                                                                                                                                                                                                                                               |   |               |   |                |   |                 |   |                 |   |                  |   |              |   |              |   |                |
| 7  | Don't recall     |                                      |                                                                                                                                                                                                                                                                                                                                                                                                                                               |   |               |   |                |   |                 |   |                 |   |                  |   |              |   |              |   |                |
| 8  | Not applicable   |                                      |                                                                                                                                                                                                                                                                                                                                                                                                                                               |   |               |   |                |   |                 |   |                 |   |                  |   |              |   |              |   |                |
| 92 | bladder_normal   | My bladder worked normally           | <p>radio (Matrix), Required</p> <table border="1"> <tr><td>1</td><td>Within 1 week</td></tr> <tr><td>2</td><td>Within 6 weeks</td></tr> <tr><td>3</td><td>Within 3 months</td></tr> <tr><td>4</td><td>Within 6 months</td></tr> <tr><td>5</td><td>Within 12 months</td></tr> <tr><td>6</td><td>Not resolved</td></tr> <tr><td>7</td><td>Don't recall</td></tr> <tr><td>8</td><td>Not applicable</td></tr> </table> <p>Question number: 57</p> | 1 | Within 1 week | 2 | Within 6 weeks | 3 | Within 3 months | 4 | Within 6 months | 5 | Within 12 months | 6 | Not resolved | 7 | Don't recall | 8 | Not applicable |
| 1  | Within 1 week    |                                      |                                                                                                                                                                                                                                                                                                                                                                                                                                               |   |               |   |                |   |                 |   |                 |   |                  |   |              |   |              |   |                |
| 2  | Within 6 weeks   |                                      |                                                                                                                                                                                                                                                                                                                                                                                                                                               |   |               |   |                |   |                 |   |                 |   |                  |   |              |   |              |   |                |
| 3  | Within 3 months  |                                      |                                                                                                                                                                                                                                                                                                                                                                                                                                               |   |               |   |                |   |                 |   |                 |   |                  |   |              |   |              |   |                |
| 4  | Within 6 months  |                                      |                                                                                                                                                                                                                                                                                                                                                                                                                                               |   |               |   |                |   |                 |   |                 |   |                  |   |              |   |              |   |                |
| 5  | Within 12 months |                                      |                                                                                                                                                                                                                                                                                                                                                                                                                                               |   |               |   |                |   |                 |   |                 |   |                  |   |              |   |              |   |                |
| 6  | Not resolved     |                                      |                                                                                                                                                                                                                                                                                                                                                                                                                                               |   |               |   |                |   |                 |   |                 |   |                  |   |              |   |              |   |                |
| 7  | Don't recall     |                                      |                                                                                                                                                                                                                                                                                                                                                                                                                                               |   |               |   |                |   |                 |   |                 |   |                  |   |              |   |              |   |                |
| 8  | Not applicable   |                                      |                                                                                                                                                                                                                                                                                                                                                                                                                                               |   |               |   |                |   |                 |   |                 |   |                  |   |              |   |              |   |                |
| 93 | energy_normal    | My energy levels were back to normal | <p>radio (Matrix), Required</p> <table border="1"> <tr><td>1</td><td>Within 1 week</td></tr> <tr><td>2</td><td>Within 6 weeks</td></tr> <tr><td>3</td><td>Within 3 months</td></tr> <tr><td>4</td><td>Within 6 months</td></tr> <tr><td>5</td><td>Within 12 months</td></tr> <tr><td>6</td><td>Not resolved</td></tr> <tr><td>7</td><td>Don't recall</td></tr> <tr><td>8</td><td>Not applicable</td></tr> </table>                            | 1 | Within 1 week | 2 | Within 6 weeks | 3 | Within 3 months | 4 | Within 6 months | 5 | Within 12 months | 6 | Not resolved | 7 | Don't recall | 8 | Not applicable |
| 1  | Within 1 week    |                                      |                                                                                                                                                                                                                                                                                                                                                                                                                                               |   |               |   |                |   |                 |   |                 |   |                  |   |              |   |              |   |                |
| 2  | Within 6 weeks   |                                      |                                                                                                                                                                                                                                                                                                                                                                                                                                               |   |               |   |                |   |                 |   |                 |   |                  |   |              |   |              |   |                |
| 3  | Within 3 months  |                                      |                                                                                                                                                                                                                                                                                                                                                                                                                                               |   |               |   |                |   |                 |   |                 |   |                  |   |              |   |              |   |                |
| 4  | Within 6 months  |                                      |                                                                                                                                                                                                                                                                                                                                                                                                                                               |   |               |   |                |   |                 |   |                 |   |                  |   |              |   |              |   |                |
| 5  | Within 12 months |                                      |                                                                                                                                                                                                                                                                                                                                                                                                                                               |   |               |   |                |   |                 |   |                 |   |                  |   |              |   |              |   |                |
| 6  | Not resolved     |                                      |                                                                                                                                                                                                                                                                                                                                                                                                                                               |   |               |   |                |   |                 |   |                 |   |                  |   |              |   |              |   |                |
| 7  | Don't recall     |                                      |                                                                                                                                                                                                                                                                                                                                                                                                                                               |   |               |   |                |   |                 |   |                 |   |                  |   |              |   |              |   |                |
| 8  | Not applicable   |                                      |                                                                                                                                                                                                                                                                                                                                                                                                                                               |   |               |   |                |   |                 |   |                 |   |                  |   |              |   |              |   |                |

|    |                           |                                                             |                                                                                                                                                                                                                                                                                                                                                                                                                |   |                |   |                |   |                           |   |                 |   |                   |   |              |   |              |   |                |
|----|---------------------------|-------------------------------------------------------------|----------------------------------------------------------------------------------------------------------------------------------------------------------------------------------------------------------------------------------------------------------------------------------------------------------------------------------------------------------------------------------------------------------------|---|----------------|---|----------------|---|---------------------------|---|-----------------|---|-------------------|---|--------------|---|--------------|---|----------------|
|    |                           |                                                             | Question number: 58                                                                                                                                                                                                                                                                                                                                                                                            |   |                |   |                |   |                           |   |                 |   |                   |   |              |   |              |   |                |
| 94 | moods_stable              | My moods stabilised                                         | radio (Matrix), Required<br><table border="1"> <tr><td>1</td><td>Within 1 week</td></tr> <tr><td>2</td><td>Within 6 weeks</td></tr> <tr><td>3</td><td>Within 3 months</td></tr> <tr><td>4</td><td>Within 6 months</td></tr> <tr><td>5</td><td>Within 12 months</td></tr> <tr><td>6</td><td>Not resolved</td></tr> <tr><td>7</td><td>Don't recall</td></tr> <tr><td>8</td><td>Not applicable</td></tr> </table> | 1 | Within 1 week  | 2 | Within 6 weeks | 3 | Within 3 months           | 4 | Within 6 months | 5 | Within 12 months  | 6 | Not resolved | 7 | Don't recall | 8 | Not applicable |
| 1  | Within 1 week             |                                                             |                                                                                                                                                                                                                                                                                                                                                                                                                |   |                |   |                |   |                           |   |                 |   |                   |   |              |   |              |   |                |
| 2  | Within 6 weeks            |                                                             |                                                                                                                                                                                                                                                                                                                                                                                                                |   |                |   |                |   |                           |   |                 |   |                   |   |              |   |              |   |                |
| 3  | Within 3 months           |                                                             |                                                                                                                                                                                                                                                                                                                                                                                                                |   |                |   |                |   |                           |   |                 |   |                   |   |              |   |              |   |                |
| 4  | Within 6 months           |                                                             |                                                                                                                                                                                                                                                                                                                                                                                                                |   |                |   |                |   |                           |   |                 |   |                   |   |              |   |              |   |                |
| 5  | Within 12 months          |                                                             |                                                                                                                                                                                                                                                                                                                                                                                                                |   |                |   |                |   |                           |   |                 |   |                   |   |              |   |              |   |                |
| 6  | Not resolved              |                                                             |                                                                                                                                                                                                                                                                                                                                                                                                                |   |                |   |                |   |                           |   |                 |   |                   |   |              |   |              |   |                |
| 7  | Don't recall              |                                                             |                                                                                                                                                                                                                                                                                                                                                                                                                |   |                |   |                |   |                           |   |                 |   |                   |   |              |   |              |   |                |
| 8  | Not applicable            |                                                             |                                                                                                                                                                                                                                                                                                                                                                                                                |   |                |   |                |   |                           |   |                 |   |                   |   |              |   |              |   |                |
|    |                           |                                                             | Question number: 59                                                                                                                                                                                                                                                                                                                                                                                            |   |                |   |                |   |                           |   |                 |   |                   |   |              |   |              |   |                |
| 95 | accepted_body_image       | I accepted the changes to my body image                     | radio (Matrix), Required<br><table border="1"> <tr><td>1</td><td>Within 1 week</td></tr> <tr><td>2</td><td>Within 6 weeks</td></tr> <tr><td>3</td><td>Within 3 months</td></tr> <tr><td>4</td><td>Within 6 months</td></tr> <tr><td>5</td><td>Within 12 months</td></tr> <tr><td>6</td><td>Not resolved</td></tr> <tr><td>7</td><td>Don't recall</td></tr> <tr><td>8</td><td>Not applicable</td></tr> </table> | 1 | Within 1 week  | 2 | Within 6 weeks | 3 | Within 3 months           | 4 | Within 6 months | 5 | Within 12 months  | 6 | Not resolved | 7 | Don't recall | 8 | Not applicable |
| 1  | Within 1 week             |                                                             |                                                                                                                                                                                                                                                                                                                                                                                                                |   |                |   |                |   |                           |   |                 |   |                   |   |              |   |              |   |                |
| 2  | Within 6 weeks            |                                                             |                                                                                                                                                                                                                                                                                                                                                                                                                |   |                |   |                |   |                           |   |                 |   |                   |   |              |   |              |   |                |
| 3  | Within 3 months           |                                                             |                                                                                                                                                                                                                                                                                                                                                                                                                |   |                |   |                |   |                           |   |                 |   |                   |   |              |   |              |   |                |
| 4  | Within 6 months           |                                                             |                                                                                                                                                                                                                                                                                                                                                                                                                |   |                |   |                |   |                           |   |                 |   |                   |   |              |   |              |   |                |
| 5  | Within 12 months          |                                                             |                                                                                                                                                                                                                                                                                                                                                                                                                |   |                |   |                |   |                           |   |                 |   |                   |   |              |   |              |   |                |
| 6  | Not resolved              |                                                             |                                                                                                                                                                                                                                                                                                                                                                                                                |   |                |   |                |   |                           |   |                 |   |                   |   |              |   |              |   |                |
| 7  | Don't recall              |                                                             |                                                                                                                                                                                                                                                                                                                                                                                                                |   |                |   |                |   |                           |   |                 |   |                   |   |              |   |              |   |                |
| 8  | Not applicable            |                                                             |                                                                                                                                                                                                                                                                                                                                                                                                                |   |                |   |                |   |                           |   |                 |   |                   |   |              |   |              |   |                |
|    |                           |                                                             | Question number: 60                                                                                                                                                                                                                                                                                                                                                                                            |   |                |   |                |   |                           |   |                 |   |                   |   |              |   |              |   |                |
| 96 | sexual_function_return    | My sexual function was back to normal                       | radio (Matrix), Required<br><table border="1"> <tr><td>1</td><td>Within 1 week</td></tr> <tr><td>2</td><td>Within 6 weeks</td></tr> <tr><td>3</td><td>Within 3 months</td></tr> <tr><td>4</td><td>Within 6 months</td></tr> <tr><td>5</td><td>Within 12 months</td></tr> <tr><td>6</td><td>Not resolved</td></tr> <tr><td>7</td><td>Don't recall</td></tr> <tr><td>8</td><td>Not applicable</td></tr> </table> | 1 | Within 1 week  | 2 | Within 6 weeks | 3 | Within 3 months           | 4 | Within 6 months | 5 | Within 12 months  | 6 | Not resolved | 7 | Don't recall | 8 | Not applicable |
| 1  | Within 1 week             |                                                             |                                                                                                                                                                                                                                                                                                                                                                                                                |   |                |   |                |   |                           |   |                 |   |                   |   |              |   |              |   |                |
| 2  | Within 6 weeks            |                                                             |                                                                                                                                                                                                                                                                                                                                                                                                                |   |                |   |                |   |                           |   |                 |   |                   |   |              |   |              |   |                |
| 3  | Within 3 months           |                                                             |                                                                                                                                                                                                                                                                                                                                                                                                                |   |                |   |                |   |                           |   |                 |   |                   |   |              |   |              |   |                |
| 4  | Within 6 months           |                                                             |                                                                                                                                                                                                                                                                                                                                                                                                                |   |                |   |                |   |                           |   |                 |   |                   |   |              |   |              |   |                |
| 5  | Within 12 months          |                                                             |                                                                                                                                                                                                                                                                                                                                                                                                                |   |                |   |                |   |                           |   |                 |   |                   |   |              |   |              |   |                |
| 6  | Not resolved              |                                                             |                                                                                                                                                                                                                                                                                                                                                                                                                |   |                |   |                |   |                           |   |                 |   |                   |   |              |   |              |   |                |
| 7  | Don't recall              |                                                             |                                                                                                                                                                                                                                                                                                                                                                                                                |   |                |   |                |   |                           |   |                 |   |                   |   |              |   |              |   |                |
| 8  | Not applicable            |                                                             |                                                                                                                                                                                                                                                                                                                                                                                                                |   |                |   |                |   |                           |   |                 |   |                   |   |              |   |              |   |                |
|    |                           |                                                             | Question number: 61                                                                                                                                                                                                                                                                                                                                                                                            |   |                |   |                |   |                           |   |                 |   |                   |   |              |   |              |   |                |
| 97 | did_not_choose            | I was not given the option to choose a type of hysterectomy | radio (Matrix), Required<br><table border="1"> <tr><td>1</td><td>Strongly agree</td></tr> <tr><td>2</td><td>Agree</td></tr> <tr><td>3</td><td>Neither agree or disagree</td></tr> <tr><td>4</td><td>Disagree</td></tr> <tr><td>5</td><td>Strongly disagree</td></tr> </table>                                                                                                                                  | 1 | Strongly agree | 2 | Agree          | 3 | Neither agree or disagree | 4 | Disagree        | 5 | Strongly disagree |   |              |   |              |   |                |
| 1  | Strongly agree            |                                                             |                                                                                                                                                                                                                                                                                                                                                                                                                |   |                |   |                |   |                           |   |                 |   |                   |   |              |   |              |   |                |
| 2  | Agree                     |                                                             |                                                                                                                                                                                                                                                                                                                                                                                                                |   |                |   |                |   |                           |   |                 |   |                   |   |              |   |              |   |                |
| 3  | Neither agree or disagree |                                                             |                                                                                                                                                                                                                                                                                                                                                                                                                |   |                |   |                |   |                           |   |                 |   |                   |   |              |   |              |   |                |
| 4  | Disagree                  |                                                             |                                                                                                                                                                                                                                                                                                                                                                                                                |   |                |   |                |   |                           |   |                 |   |                   |   |              |   |              |   |                |
| 5  | Strongly disagree         |                                                             |                                                                                                                                                                                                                                                                                                                                                                                                                |   |                |   |                |   |                           |   |                 |   |                   |   |              |   |              |   |                |
|    |                           |                                                             | Question number: 62                                                                                                                                                                                                                                                                                                                                                                                            |   |                |   |                |   |                           |   |                 |   |                   |   |              |   |              |   |                |
| 98 | right_choice              | It was the right choice made either by me or my Doctor      | radio (Matrix), Required<br><table border="1"> <tr><td>1</td><td>Strongly agree</td></tr> <tr><td>2</td><td>Agree</td></tr> <tr><td>3</td><td>Neither agree or disagree</td></tr> </table>                                                                                                                                                                                                                     | 1 | Strongly agree | 2 | Agree          | 3 | Neither agree or disagree |   |                 |   |                   |   |              |   |              |   |                |
| 1  | Strongly agree            |                                                             |                                                                                                                                                                                                                                                                                                                                                                                                                |   |                |   |                |   |                           |   |                 |   |                   |   |              |   |              |   |                |
| 2  | Agree                     |                                                             |                                                                                                                                                                                                                                                                                                                                                                                                                |   |                |   |                |   |                           |   |                 |   |                   |   |              |   |              |   |                |
| 3  | Neither agree or disagree |                                                             |                                                                                                                                                                                                                                                                                                                                                                                                                |   |                |   |                |   |                           |   |                 |   |                   |   |              |   |              |   |                |

|     |                                                        |                                                                                                                                                              |                                                                                                                                                                                                                                                                                                              |   |                |   |                   |   |                           |   |          |   |                   |
|-----|--------------------------------------------------------|--------------------------------------------------------------------------------------------------------------------------------------------------------------|--------------------------------------------------------------------------------------------------------------------------------------------------------------------------------------------------------------------------------------------------------------------------------------------------------------|---|----------------|---|-------------------|---|---------------------------|---|----------|---|-------------------|
|     |                                                        |                                                                                                                                                              | <table border="1"> <tr><td>4</td><td>Disagree</td></tr> <tr><td>5</td><td>Strongly disagree</td></tr> </table> <p>Question number: 63</p>                                                                                                                                                                    | 4 | Disagree       | 5 | Strongly disagree |   |                           |   |          |   |                   |
| 4   | Disagree                                               |                                                                                                                                                              |                                                                                                                                                                                                                                                                                                              |   |                |   |                   |   |                           |   |          |   |                   |
| 5   | Strongly disagree                                      |                                                                                                                                                              |                                                                                                                                                                                                                                                                                                              |   |                |   |                   |   |                           |   |          |   |                   |
| 99  | regret_choice                                          | I regret the choice that was made either by me or my Doctor                                                                                                  | <p>radio (Matrix), Required</p> <table border="1"> <tr><td>1</td><td>Strongly agree</td></tr> <tr><td>2</td><td>Agree</td></tr> <tr><td>3</td><td>Neither agree or disagree</td></tr> <tr><td>4</td><td>Disagree</td></tr> <tr><td>5</td><td>Strongly disagree</td></tr> </table> <p>Question number: 64</p> | 1 | Strongly agree | 2 | Agree             | 3 | Neither agree or disagree | 4 | Disagree | 5 | Strongly disagree |
| 1   | Strongly agree                                         |                                                                                                                                                              |                                                                                                                                                                                                                                                                                                              |   |                |   |                   |   |                           |   |          |   |                   |
| 2   | Agree                                                  |                                                                                                                                                              |                                                                                                                                                                                                                                                                                                              |   |                |   |                   |   |                           |   |          |   |                   |
| 3   | Neither agree or disagree                              |                                                                                                                                                              |                                                                                                                                                                                                                                                                                                              |   |                |   |                   |   |                           |   |          |   |                   |
| 4   | Disagree                                               |                                                                                                                                                              |                                                                                                                                                                                                                                                                                                              |   |                |   |                   |   |                           |   |          |   |                   |
| 5   | Strongly disagree                                      |                                                                                                                                                              |                                                                                                                                                                                                                                                                                                              |   |                |   |                   |   |                           |   |          |   |                   |
| 100 | same_choice                                            | If I had to choose again or had been able to choose, the decision would remain the same                                                                      | <p>radio (Matrix), Required</p> <table border="1"> <tr><td>1</td><td>Strongly agree</td></tr> <tr><td>2</td><td>Agree</td></tr> <tr><td>3</td><td>Neither agree or disagree</td></tr> <tr><td>4</td><td>Disagree</td></tr> <tr><td>5</td><td>Strongly disagree</td></tr> </table> <p>Question number: 65</p> | 1 | Strongly agree | 2 | Agree             | 3 | Neither agree or disagree | 4 | Disagree | 5 | Strongly disagree |
| 1   | Strongly agree                                         |                                                                                                                                                              |                                                                                                                                                                                                                                                                                                              |   |                |   |                   |   |                           |   |          |   |                   |
| 2   | Agree                                                  |                                                                                                                                                              |                                                                                                                                                                                                                                                                                                              |   |                |   |                   |   |                           |   |          |   |                   |
| 3   | Neither agree or disagree                              |                                                                                                                                                              |                                                                                                                                                                                                                                                                                                              |   |                |   |                   |   |                           |   |          |   |                   |
| 4   | Disagree                                               |                                                                                                                                                              |                                                                                                                                                                                                                                                                                                              |   |                |   |                   |   |                           |   |          |   |                   |
| 5   | Strongly disagree                                      |                                                                                                                                                              |                                                                                                                                                                                                                                                                                                              |   |                |   |                   |   |                           |   |          |   |                   |
| 101 | choice_did_harm                                        | The choice did me a lot of harm                                                                                                                              | <p>radio (Matrix), Required</p> <table border="1"> <tr><td>1</td><td>Strongly agree</td></tr> <tr><td>2</td><td>Agree</td></tr> <tr><td>3</td><td>Neither agree or disagree</td></tr> <tr><td>4</td><td>Disagree</td></tr> <tr><td>5</td><td>Strongly disagree</td></tr> </table> <p>Question number: 66</p> | 1 | Strongly agree | 2 | Agree             | 3 | Neither agree or disagree | 4 | Disagree | 5 | Strongly disagree |
| 1   | Strongly agree                                         |                                                                                                                                                              |                                                                                                                                                                                                                                                                                                              |   |                |   |                   |   |                           |   |          |   |                   |
| 2   | Agree                                                  |                                                                                                                                                              |                                                                                                                                                                                                                                                                                                              |   |                |   |                   |   |                           |   |          |   |                   |
| 3   | Neither agree or disagree                              |                                                                                                                                                              |                                                                                                                                                                                                                                                                                                              |   |                |   |                   |   |                           |   |          |   |                   |
| 4   | Disagree                                               |                                                                                                                                                              |                                                                                                                                                                                                                                                                                                              |   |                |   |                   |   |                           |   |          |   |                   |
| 5   | Strongly disagree                                      |                                                                                                                                                              |                                                                                                                                                                                                                                                                                                              |   |                |   |                   |   |                           |   |          |   |                   |
| 102 | wise_choice                                            | It was the wisest choice                                                                                                                                     | <p>radio (Matrix), Required</p> <table border="1"> <tr><td>1</td><td>Strongly agree</td></tr> <tr><td>2</td><td>Agree</td></tr> <tr><td>3</td><td>Neither agree or disagree</td></tr> <tr><td>4</td><td>Disagree</td></tr> <tr><td>5</td><td>Strongly disagree</td></tr> </table> <p>Question number: 67</p> | 1 | Strongly agree | 2 | Agree             | 3 | Neither agree or disagree | 4 | Disagree | 5 | Strongly disagree |
| 1   | Strongly agree                                         |                                                                                                                                                              |                                                                                                                                                                                                                                                                                                              |   |                |   |                   |   |                           |   |          |   |                   |
| 2   | Agree                                                  |                                                                                                                                                              |                                                                                                                                                                                                                                                                                                              |   |                |   |                   |   |                           |   |          |   |                   |
| 3   | Neither agree or disagree                              |                                                                                                                                                              |                                                                                                                                                                                                                                                                                                              |   |                |   |                   |   |                           |   |          |   |                   |
| 4   | Disagree                                               |                                                                                                                                                              |                                                                                                                                                                                                                                                                                                              |   |                |   |                   |   |                           |   |          |   |                   |
| 5   | Strongly disagree                                      |                                                                                                                                                              |                                                                                                                                                                                                                                                                                                              |   |                |   |                   |   |                           |   |          |   |                   |
| 103 | perpare_pt_better                                      | Looking back now, what information could have helped you prepare for your choice of hysterectomy better and how could this have been better provided to you? | <p>notes</p> <p>Custom alignment: LV</p> <p>Question number: 68</p>                                                                                                                                                                                                                                          |   |                |   |                   |   |                           |   |          |   |                   |
| 104 | comments                                               | Please provide any other comments that you would like to share about your hysterectomy experience                                                            | <p>notes</p> <p>Custom alignment: LV</p> <p>Question number: 69</p>                                                                                                                                                                                                                                          |   |                |   |                   |   |                           |   |          |   |                   |
| 105 | survey_on_womens_experience_with_hysterectomy_complete | Complete?                                                                                                                                                    | <p>dropdown</p> <table border="1"> <tr><td>0</td><td>Incomplete</td></tr> <tr><td>1</td><td>Unverified</td></tr> <tr><td>2</td><td>Complete</td></tr> </table>                                                                                                                                               | 0 | Incomplete     | 1 | Unverified        | 2 | Complete                  |   |          |   |                   |
| 0   | Incomplete                                             |                                                                                                                                                              |                                                                                                                                                                                                                                                                                                              |   |                |   |                   |   |                           |   |          |   |                   |
| 1   | Unverified                                             |                                                                                                                                                              |                                                                                                                                                                                                                                                                                                              |   |                |   |                   |   |                           |   |          |   |                   |
| 2   | Complete                                               |                                                                                                                                                              |                                                                                                                                                                                                                                                                                                              |   |                |   |                   |   |                           |   |          |   |                   |
